# 1 Identification and mapping of central pair proteins by proteomic 2 analysis

3  
4 Daniel Dai<sup>1</sup>, Muneyoshi Ichikawa<sup>1,2</sup>, Katya Peri<sup>1</sup>, Reid Rebinsky<sup>1</sup> Khanh Huy Bui<sup>1</sup>

5 <sup>1</sup>Department of Anatomy and Cell Biology, McGill University, Montréal, Québec H3A 0C7.  
6 Canada

7 <sup>2</sup>Present address: Department of Systems Biology, Graduate School of Biological Sciences, Nara  
8 Institute of Science and Technology, 8916-5, Takayama-cho, Ikoma, Nara 630-0192, Japan

9

10 Corresponding authors:

11 Muneyoshi Ichikawa, Department of Systems Biology, Graduate School of Biological Sciences,  
12 Nara Institute of Science and Technology, 8916-5, Takayama-cho, Ikoma, Nara 630-0192,  
13 Japan. e-mail: [michikawa@bs.naist.jp](mailto:michikawa@bs.naist.jp); Khanh Huy Bui, Department of Anatomy and Cell  
14 Biology, McGill University, Montréal, Québec H3A 0C7. Canada. e-mail: [huy.bui@mcgill.ca](mailto:huy.bui@mcgill.ca)

15

## 16 Abstract

17 Cilia or flagella of eukaryotes are small micro-hair like structures that are indispensable to  
18 single-cell motility and play an important role in mammalian biological processes. Cilia or flagella  
19 are composed of nine doublet microtubules surrounding a pair of singlet microtubules called the  
20 central pair (CP). Together, this arrangement forms the canonical and highly conserved 9+2  
21 axonemal structure. The CP, which is a unique structure exclusive to motile cilia, is a pair of  
22 structurally dimorphic singlet microtubules decorated with numerous associated proteins.  
23 Mutations of CP-associated proteins cause several different physical symptoms termed ciliopathies.  
24 Thus, it is crucial to understand the architecture of the CP. However, the protein composition of  
25 the CP was poorly understood. This was because identification of CP proteins was mostly limited  
26 by available *Chlamydomonas* mutants of CP proteins. In this study, we conducted a comprehensive  
27 CP proteome analysis using several CP mutants and identified 37 novel CP protein candidates. By  
28 using *Chlamydomonas* strains lacking specific CP sub-structures, we also present a more complete  
29 model of localization of known and newly identified CP proteins. This work has established a new  
30 foundation for CP protein analysis for future studies.

31

32 **Keywords:** Cilia, Flagella, Axoneme, Central Pair, Mass Spectrometry, Electron Microscopy

33

34

35

## 36 **Introduction**

37

38

39

40

41

42

43

44

45

46

47

48

49

50

51

52

53

54

55

56

57

58

59

Cilia and flagella are common terms used to describe the same hair-like structure of eukaryotic cells and will therefore be used interchangeably in this paper. It is known that defective cilia are implicated in a variety of different human diseases, from developmental disorders to metabolic syndromes[1]. However not all cilia are alike. Primary cilia are nonmotile and are commonly reported as sensory receptors [2]. Motile cilia, on the other hand, show beating motion at high frequencies driven by motor protein dyneins [3]. This rudimentary motion is the driving force for a plethora of multi-level systems from single cell movement to mammalian organ function and maintenance [1]. Motile cilia present in our respiratory system beat together in order to clear mucus build up and infectious agents [4]. Cilia-related diseases, otherwise known as ciliopathies, such as primary ciliary dyskinesia (PCD) are derived from the impairment of motile cilia [5, 6]. PCD is a rare congenital disease caused by defects in motile cilia. Patients who suffer from PCD often experience a wide spectrum of symptoms ranging from male infertility to an increased susceptibility to respiratory infections [7]. Failure to recognize or diagnose PCD early on often can be lethal later in life [4]. A common practice used to diagnose PCD is a cross-section analysis of patient nasal epithelium cilia using transmission electron microscopy (TEM). Due to the diversity of PCD mutations, however, many different defective proteins can lead to similar malformations [7]. In addition to this, not all mutations produce visible differences at standard TEM resolution level while they still induce PCD like symptoms. The largest obstacle to our understanding of cilia-related defects is our limited comprehension of the proteins that make up the cilia.

The cilia are highly complex structures composed from different compartments. Motile cilia consist of nine doublet microtubules (DMTs) surrounding a pair of singlet microtubules called

60 the central pair (CP) [8]. This specific arrangement defines the “9+2” structure of the axoneme  
61 (Fig. 1A). There exists axonemal dyneins (outer dynein arm, ODA; and inner dynein arm, IDA)  
62 attached to DMTs which are responsible for the beating of cilia. Radial spoke (RS) complexes are  
63 extending from DMTs toward the CP. Intraflagellar transport (IFT) driven by IFT dyneins and IFT  
64 kinesins takes place on the DMTs [9]. This arrangement of the axoneme structure is highly  
65 conserved in all eukaryotes with motile cilia, suggesting that there exists a similar set of proteins  
66 and processes required for similar functional output. Thus, we can study the axoneme composition  
67 using model organisms like a green alga *Chlamydomonas reinhardtii*.

68 The presence of the CP distinguishes motile cilia from its immotile counterpart, primary  
69 cilia. The CP works in a diverse array of function including the regulation of local  $\text{Ca}^{2+}$   
70 concentration, ATP/ADP concentration and axonemal dynein activities through mechanical  
71 interactions with RS[10-13]. The CP is a huge protein complex composed of a pair of structurally  
72 and functionally dimorphic singlet microtubules named C1 and C2 and many other associated  
73 proteins [14]. The CP has a variety of sub-structures such as C1a, C1b, C1c and C1d on the C1  
74 singlet, or C2a, C2b and C2c on the C2 singlet as characterized by traditional cross-sectional  
75 electron microscopy (EM) (Fig. 1B). C1 and C2 microtubules are connected by a structure called  
76 the “bridge” and “diagonal link”. With recent higher resolution cryo-electron tomography (cryo-  
77 ET) structures, more details of these sub-structures have been characterized allowing the C1a to  
78 be sub-classified as C1a/e, C1b as C1b/f, C2a as C2a/e and C2c as C2c/d[15]. Through this  
79 manuscript, we follow the newer nomenclature of the CP sub-structures as in Fig. 1B. These sub-  
80 structures bind with 16- or 32-nm repeating units along the axonemal axis[15]. Despite its unique  
81 existence in motile cilia and its importance to motility, the proteins that comprise the CP remain  
82 mostly unknown. Traditionally, 22 proteins (apart from  $\alpha$ - and  $\beta$ -tubulins) have been characterized

83 as components of CP (Table 1). For example, kinesin-like protein 1 (KLP1) is a phosphoprotein  
84 that localizes at the C2 microtubule around C2c/d region[16]. Mutations in several known CP  
85 proteins such as Hydin located at the C2b/f, and FAP221 (PCDP1) at the C1d have been previously  
86 shown to cause ciliopathic symptoms [10, 17]. However, it is generally believed that there should  
87 be more unidentified proteins inside the CP complex. For instance, CP-specific kinesin other than  
88 KLP1 was detected by Western blots, without knowledge about its identity[18]. Due to random  
89 insertions of transgenes into *Chlamydomonas reinhardtii* genome, previous characterization of CP  
90 proteins largely relied on phenotype-based screening of obtained CP protein mutants[19, 20]. This  
91 approach, however, remains inefficient and biased towards proteins which produce visible  
92 phenotypes.

93 In this study, we used a more comprehensive approach taking advantage of relative  
94 quantitative mass spectrometry (MS) comparing *Chlamydomonas* strains with and without intact  
95 CP. By doing so, we identified 37 new CP protein candidates. Using several different  
96 *Chlamydomonas* mutant strains of CP, we also localized these new CP proteins to certain CP sub-  
97 structures. Our results have established a new foundation for understanding the CP architecture.  
98

## 99 **Materials and Methods**

### 100 **Strains and culture condition**

101 *Chlamydomonas reinhardtii* strains used in this study are as follows: CC-124 (Wild Type, WT),  
102 CC-1033 (*pf15*, central pair-less) [21], CC-5148 (*cpc1*, C1b/f mutant) [14], CC-1034 (*pf16*, C1  
103 unstable) [22] and CC-1029 (*pf6*, C1a/e mutant) [23]. The cells were purchased from  
104 *Chlamydomonas* resource center and cultured in Tris-acetatephosphate (TAP) liquid media[24]  
105 with shaking or stirring, or on TAP solid plate containing 1.5% agar, on a 12 h light and 12 h dark  
106 cycle. For flagella purification, each *Chlamydomonas* strain was cultured in 1 L liquid TAP media  
107 with stirring until OD<sub>600</sub> reached around 0.5-0.6.

108

### 109 ***Chlamydomonas* flagella isolation and purification of microtubule fraction**

110 The cells were harvested by low-speed centrifugation (700g for 7 min at 4°C), and flagella were  
111 removed from the cell bodies by pH shock[25]. Cell bodies were removed by low speed  
112 centrifugation (1,800g for 5 min at 4°C) in HMDS (10mM HEPES, pH7.4, 5mM MgSO<sub>4</sub>, 1mM  
113 DTT, 4% sucrose containing 10 µg/ml aprotinin and 5 µg/ml leupeptin) and flagella were collected  
114 by higher-speed centrifugation (4,696g for 40 min at 4°C). Isolated flagella were resuspended in  
115 HMDEKP buffer (30 mM HEPES, pH 7.4, 5 mM MgSO<sub>4</sub>, 1 mM DTT, 0.5 mM EGTA, 25 mM  
116 potassium acetate, 0.5% polyethylene glycol, (MW 20,000) containing 10 µM paclitaxel, 1 mM  
117 Phenylmethylsulfonyl fluoride (PMSF), 10 µg/ml aprotinin and 5 µg/ml leupeptin). Paclitaxel,  
118 PMSF, leupeptin and aprotinin were added to the buffer throughout the purification after this step.  
119 Flagella were demembrated by incubating with HMDEKP buffer containing 1.5% NP40 for 30  
120 min on ice. For cryo-electron microscopy (cryo-EM), sonication was performed for better splitting  
121 of axoneme after NP40 treatment. *Chlamydomonas* axonemes were then spun down by table top

122 centrifuge (7,800g for 10 min at 4°C). To split the bundle of axoneme axonemes were incubated  
123 with final 1 mM ADP for 10 min at room temperature to activate dynein and then incubated with  
124 0.1 mM ATP for 10 min at room temperature to induce doublet sliding and spun down (16,000g  
125 for 10 min at 4°C). Protease was not added for splitting. After this, *Chlamydomonas* microtubule  
126 fraction was incubated twice with HMDEKP buffer containing 0.6 M NaCl for 30 min on ice, spun  
127 down (16,000g for 10 min at 4°C), and resuspended in HMDEKP buffer. Purification process was  
128 performed three times for each strain for biological triplicates.

129

### 130 **Cryo-electron microscopy**

131 3.5 µl of microtubule fraction sample (~4 mg/ml) purified from WT *Chlamydomonas* was  
132 applied to glow-discharged holey carbon grids (Quantifoil R2/2), blotted and vitrified in  
133 liquid ethane using the Vitrobot Mark IV (FEI Company). Micrographs were obtained at 59kx  
134 nominal magnification on the direct electron detector Falcon II with the FEI Titan Krios using  
135 a total dose of ~28 electrons/Å<sup>2</sup> and 7 frames (calibrated pixel size of 1.375 Å/pixel). The  
136 defocus range was between -1.2 and -3.8 µm.

137

### 138 **Whole gel MS analysis**

139 4x Laemmli buffer (#1610747, Bio-Rad) was added to the microtubule fraction samples in  
140 HMDEKP buffer so that it will be 1x, and 25-30 µg protein was loaded on the SDS-PAGE gel.  
141 Electrophoresis was performed, but the run was terminated before the proteins entered the  
142 separation gel. A band containing all proteins in the sample was then cut out from the gel and  
143 subjected to in-gel digestion[26]. Obtained peptides (~2 µg) were chromatographically separated  
144 on a Dionex Ultimate 3000 UHPLC. First, peptides were loaded onto a Thermo Acclaim Pepmap

145 (Thermo, 75  $\mu$ m ID  $\times$  2 cm with 3  $\mu$ m C18 beads) precolumn, and then onto an Acclaim Pepmap  
146 Easyspray (Thermo, 75  $\mu$ m  $\times$  25 cm with 2  $\mu$ m C18 beads) analytical column and separated with  
147 a flow rate of 200 nl/min with a gradient of 2-35% solvent (acetonitrile containing 0.1% formic  
148 acid) over 2 hours. Peptides of charge 2+ or higher were recorded using a Thermo Orbitrap Fusion  
149 mass spectrometer operating at 120,000 resolution (FWHM in MS1, 15,000 for MS/MS). The data  
150 was searched against *Chlamydomonas reinhardtii* protein dataset from UniProt  
151 (<https://www.uniprot.org/>).

152

### 153 **Data analysis**

154 MS data were analyzed by Scaffold\_4.8.4 (Proteome Software Inc.). Proteins with mean values of  
155 exclusive unique peptide count of 2 or more in the WT MS results were used for analysis. Raw  
156 MS data were normalized by total spectra. To identify CP protein candidates, Student's *t*-test was  
157 applied to *pf15* and WT MS results using biological triplicates. Proteins exhibited a minimum four-  
158 fold change and the statistical significance threshold ( $p < 0.05$ ) in *pf15* result, or proteins which  
159 were completely missing in *pf15* result were identified as new CP candidates. For statistical  
160 analysis using several mutant strain MS results, one-way analysis of variance (ANOVA) followed  
161 by Dunnett's multiple comparisons test was performed by GraphPad Prism 8.

162

163

164 **Results and Discussion**

165

166 **Purification of the axoneme fraction retaining the CP proteins with reduced amounts of**  
167 **unrelated proteins**

168

169 Previous approach targeting each CP protein one by one was a time-consuming process

170 [10, 14, 17, 18, 21-23, 27, 28]. Here, we aimed to obtain the whole CP proteome using MS. Due

171 to the sensitive nature of MS, peptide detection tends to have an unfavorable preference for large

172 and abundant proteins. In our previous paper, we used a ciliate *Tetrahymena thermophila* as a

173 model organism[29], but the green alga *Chlamydomonas reinhardtii* was used in this study since

174 there were contaminated mucocyst proteins in the MS of microtubule fraction purified from

175 *Tetrahymena* (unpublished data). Previous proteomic analysis of whole *Chlamydomonas* flagella

176 also showed the presence of an abundant amount of proteins from membrane and matrix fractions,

177 and large proteins such as dynein heavy chains [30]. Thus, it was important to prepare samples for

178 MS with reduced amount of unrelated proteins which would hinder the detection of CP proteins,

179 while the CP structure with its associated proteins remains undisturbed. To achieve this,

180 microtubule fraction was purified from WT *Chlamydomonas* flagella by sequential purification

181 following the deflagellation by pH shock (Fig. 2A). First, proteins from the membrane and matrix

182 fraction were removed by NP-40 treatment. Demembrated axonemes were treated with 0.6 M

183 NaCl twice to extract axonemal dyneins as much as possible. From SDS-PAGE, significant

184 amounts of proteins were removed in the final extract leaving the tubulin band which is a main

185 component of CP and DMT (Fig. 2B). Though we also tried to remove RS complexes by dialysis

186 against low salt buffer[29] or KI treatment[31], it was not possible to remove *Chlamydomonas* RS

187 complex keeping microtubule structures unaffected. Thus, the RS complexes were left in our

188 sample. To detect all proteins in the sample, the purified microtubule fraction was analyzed by

189 whole gel MS (Materials and Methods) and almost all (21 out of 22) known CP proteins such as



190 Hydin, CPC1, Pf6, FAP69, Pf16, KLP1 and FAP221 (PCDP1) were detected (Table 1). The only  
191 known CP protein which we failed to detect was FAP227 (C1a-18) [32]. Since the size of FAP227  
192 is small (18 kDa), it is thought to be unfavorable for the detection by MS. Known CP proteins  
193 detected were previously shown to localize at different CP sub-structures (Table 1). Microtubule  
194 inner protein (MIP) candidates like Rib43a, Rib72 and Tektin[33], and RS proteins were also  
195 detected since these structures are tightly associated with DMTs (Supplementary Excel File 1).  
196 Proteins from other axonemal components such as IFT complex proteins, IFT dyneins, IFT  
197 kinesins, axonemal dyneins, and dynein regulatory complex were still detected due to the high  
198 sensitivity of MS though we tried to reduce them as much as possible. Twice salt treated samples  
199 were imaged using cryo-EM and singlet microtubules from CP with characteristic repeating  
200 protrusions were observed along with DMTs (Fig. 2C and Fig. S1). Together with this cryo-EM  
201 result, we concluded that our purification method retained the CP proteins and was usable for  
202 proteomic analysis.

203

#### 204 **Identification of new CP proteins by comparative proteomic analysis**

205

206 Next, we sought to characterize new CP protein candidates. Since it is not possible to sub-  
207 fractionate CPs from DMTs as they are both microtubule-based structures, we decided to use a  
208 comparative proteomic approach using a specific *Chlamydomonas* mutant lacking whole CP  
209 complex. *Chlamydomonas* mutant strain *pfl5* contains a mutation in a gene encoding p80 subunit  
210 of microtubule severing enzyme Katanin[21]. The resulting effects prevent the entire CP complex  
211 from assembling and lead to paralyzed flagella while leaving other components like DMTs intact  
212 (Fig. 3A). *pfl5* strain was chosen among other CP-less mutants in this study since it was previously  
213 shown that the flagella length of *pfl5* strain is closer to that of WT compared with other CP-less  
214 mutants[34]. An identical purification process as WT was used for *pfl5* mutant flagella, and the

215 MS analysis was performed from the microtubule fraction of *pfl5* (Fig. 3A and B). Similar amount  
216 of *pfl5* microtubule fraction as WT was analyzed by whole gel MS, and these results were  
217 normalized by total spectra and compared (see details for Materials and Methods). In the MS result  
218 of *pfl5* sample, there were many proteins significantly reduced or completely missing compared  
219 with the WT result (Fig. 3C). Proteins known to be tightly associated with DMTs including Rib43a,  
220 Rib72 and Tektin and RS proteins were detected at the similar levels with WT (Supplementary  
221 Excel File 2). In contrast, 18 out of 20 known CP proteins detected in WT were completely missing  
222 or significantly decreased in *pfl5* result (Table 1). Calmodulin did not show significant decrease  
223 in the *pfl5* MS result. Since Calmodulin is shared with the RS[31] the decrease of Calmodulin is  
224 thought to be masked by signals from the remaining RS. FAP174 also did not show significant  
225 decrease but this could mean that FAP174 is also present in other axonemal structures as well  
226 (discussed later).

227 To clearly see the differences between WT and *pfl5* results, we performed comparison  
228 based on protein categories which include, tubulins, IFT complex, IFT-dynein, IFT-kinesin, RS  
229 proteins, axonemal dyneins, dynein regulatory complex proteins, MIPs, and known CP proteins  
230 (Fig. 2B). Since values were normalized,  $\alpha$ - and  $\beta$ -tubulins were detected at the same level between  
231 WT and *pfl5* results and served as a control (Fig. 3D). As clusters, only known CP proteins were  
232 significantly decreased in *pfl5* MS results, validating our strategy. In our *pfl5* MS result, IFT  
233 complex proteins were slightly up-regulated similarly with previous observations[34] but not  
234 significantly in our condition. Other classes like IFT dynein, IFT kinesin, axonemal dyneins,  
235 dynein regulatory complex proteins, and MIPs did not show any significant decrease as compared  
236 to known CP proteins category. From these results, we concluded that our method is valid to  
237 identify CP proteins.

238           Among previously characterized CP proteins was a population of previously  
239 uncharacterized proteins totally missing or significantly reduced in *pf15* result. These  
240 characterized proteins were thought to be new candidates of the CP. Though CP proteins like  
241 enolase and HSP70, which are known to be shared with other axonemal component, showed two-  
242 to four-fold decrease in *pf15* result, this area also contained proteins such as DHC9, p38 and KAP  
243 from other categories (Fig. 3D). Almost all the proteins from other complexes did not show  
244 decrease with four-fold or larger except DHC8 (Supplementary Excel File 2). Thus, proteins which  
245 were decreased significantly ( $p < 0.05$ ) with a 4-fold decrease or greater in *pf15* compared with  
246 WT result, or completely missing in *pf15* were categorized as new CP proteins. 37 proteins  
247 including FAP7, FAP47, FAP65, FAP70 were identified as new CP candidates with this criterion  
248 (Fig. 3D and Table 2). One of these newly identified CP protein candidates was FAP125. FAP125  
249 is a kinesin-like protein which was previously proposed to be another kinesin-like protein in CP  
250 without direct evidence[35]. Our study presented direct evidence showing that FAP125 is actually  
251 a novel CP-associated kinesin in addition to KLP-1. Furthermore, phosphoglycerate mutase was  
252 detected in WT result but completely missing in *pf15* result (Table 2). Phosphoglycerate mutase  
253 was previously shown to be present in the axoneme and play roles in ATP production together  
254 with enolase[36]. Interestingly, enolase which is involved in the same ATP synthesis pathway  
255 together with phosphoglycerate mutase is known to be a component of CP as well as present in  
256 the membrane and matrix fractions. Since these enzymes work together, it is likely that  
257 phosphoglycerate mutase is also integrated into the CP complex to facilitate the reaction.

258           During the time we were finishing this manuscript, a similar proteomic study aiming to  
259 identify CP proteins was published[37]. In this study, *pf18 Chlamydomonas* strain, which also  
260 lacks CP complex, was used to compare with WT strain instead of *pf15* used in our study. In

261 addition, only demembrated whole axoneme structure was analyzed by quantitative MS instead  
262 of purified microtubule fractions. We also performed biological triplicate through our work to  
263 identify only consistent candidates unlike replicate in theirs. Despite the differences in strains and  
264 methods used, 26 out of 37 identified proteins in our work were shared with their results, making  
265 these proteins very strong candidates of CP proteins (Table 2). 11 proteins were assigned as new  
266 CP candidates only in our work and 19 proteins only in [37] (Table 2 and Table S1). These  
267 differences might be due to contaminated proteins from remaining axonemal components in Zhao  
268 *et al.*'s purification method. For example, proteins like FAP39, 49, 72, 139 and 154 were  
269 characterized as new CP protein candidates in Zhao *et al.*, (2019) [37], but these proteins were  
270 consistently detected in *pf15* in our triplicate result and less likely to be a stable components of CP  
271 complex (Table S1). Conversely, it could be because some of the CP proteins fell off in our  
272 purification method. NAP was shown to be a component of the C1a/e region by  
273 immunoprecipitation by Zhao *et al.*, [37], but we failed to detect NAP in our MS. This could be  
274 due to its weak association of NAP to the C1a/e region. DPY30 was also identified and further  
275 confirmed to be a component of CP by immunofluorescence [37]. We detected DPY30 in our MS  
276 results, but the detected amount was little and was not in our original CP list. It is also possible  
277 that differences are due to different strains used (discussed later). Nevertheless, it is noteworthy  
278 that even using different strains and methods, many common proteins were identified as new CP  
279 protein candidates. These two studies can be used in a mutually complementary way to understand  
280 the architecture of the CP complex.

## 281 282 **Localizing CP candidates into sub-structures of CP complex**

283  
284 We further aimed to identify the localizations of these new CP proteins inside CP complex.

285 To achieve this, we used different kinds of *Chlamydomonas* mutants lacking specific CP sub-

286 substructures *pf6* (C1a/e mutant) and *cpc1* (C1b/f mutant) in addition to *pf16* (unstable C1  
287 microtubule) (Fig. 4A). Following the same sample preparations and MS conditions as WT (Fig.  
288 S2), we compared normalized MS results from five different strains allowing us to produce MS  
289 detection profile for each protein of interests (Fig. 4B-F and Fig. S3).

290 Traditionally known CP proteins which localize at the same area shared similar MS profiles.  
291 CP proteins like PF6, FAP101, FAP114 (C1a-32) and FAP119 (C1a-34), which were shown to be  
292 located at the C1a/e sub-structure[23, 32], were detected both in WT and *cpc1* strains since they  
293 retain the C1a/e structure while these proteins were not detected or detected with very little  
294 amounts in *pf6*, *pf15* and *pf16* strains because of the lack of the C1a/e region (Fig. 4B). To verify  
295 this statistically, we performed ANOVA test and these known C1a/e proteins (PF6, FAP101,  
296 FAP114 (C1a-32) and FAP119 (C1a-34)) were all significantly decreased in *pf6*, *pf15* and *pf16*  
297 strains but not in *cpc1* strain (Fig. 4B). Among our new CP candidates, FAP7, FAP348 and  
298 CHLREDRAFT\_150638 showed the same pattern by ANOVA test and thought to be present in  
299 the C1a/e region (Fig. 5, and Table 2). Though it was not in our original CP candidates, DPY30  
300 which was proposed to be located at the C1a/f region by immunoprecipitation[37], also met this  
301 standard further verifying our assignment.

302 There were several CP proteins known to localize at the C1d area. FAP46, FAP54, FAP74,  
303 FAP221 (PCDP1) and FAP297 are such proteins[10]. These proteins were proposed to form a  
304 complex located at the C1d region. In our MS profile, most of these proteins show a similar trend  
305 being significantly reduced only in *pf15* and *pf16* strains since they lack this region (Fig. 4C). The  
306 only exception was FAP297 which showed significant reduction in *cpc1* strain which lacked the  
307 C1b/f region (Fig. S3A). This could mean that FAP297 is located at the interface between the C1d  
308 and the C1f and interacting with proteins from the C1f (Fig. 5). Zhao *et al.*, also were not able to

309 detect FAP297 by immunoprecipitation using FAP46 as a bait though all other known C1d proteins  
310 were detected [37]. This further supports our idea that FAP297 is located away from other C1d  
311 proteins. Thus, the trend shared between FAP46, 54, 74 and 221 was used as a standard for C1d  
312 protein candidates. Our CP candidates were classified into the C1d area based on the statistical  
313 analysis results of MS profiles. FAP76, 81, 92, 105, 108, 279 and 289 showed similar trends (Fig.  
314 4C and S3A) and were assigned into the C1d (Fig. 5 and Table 2). FAP279 is a leucine-rich repeat-  
315 containing protein that was not assigned as a CP protein before. A homologue is also present in  
316 humans (LRRC72). FAP81 was proposed to be a component of the C1a/e projection since it was  
317 detected along with other known C1a/e proteins by immunoprecipitation using DPY30 as a  
318 bait[37]. Our result using different mutant strains does not support their conclusion of localization  
319 since FAP81 is clearly present in *pf6* mutant lacking this region. Rather, FAP81 is thought to  
320 interact with DPY30 via other protein (discussed later). Our MS profile gives insights not only for  
321 new CP candidates but also for previously known CP proteins. PF16 protein which is a known C1  
322 protein also showed similar MS profile with other C1d proteins (Fig. 4C) and thus thought to be  
323 located at this region (discussed later).

324 Some proteins like MOT17, FAP125, FAP209 and FAP219 showed significant reduction  
325 only in *pf15* and *pf16* strains by ANOVA test like other C1d proteins, but these proteins were  
326 slightly reduced in *pf6* strain (Fig. 4C lowest row). These MS patterns were somewhat at the middle  
327 of known C1a/e proteins and C1d proteins. Thus, these proteins are thought to be at the interface  
328 of the C1a/e and the C1d, namely the C1c area (Fig. 5). One of these proteins, MOT17 was shown  
329 to interact with known C1a/e proteins by immunoprecipitation which is neighboring region of the  
330 C1c[37]. FAP125 was proposed to be somewhere in C1 microtubule, but its localization to certain

331 sub-structure was not achieved. Our result located FAP125 into specific sub-structure of the C1  
332 microtubule. For FAP209&219, there were no localization information at all.

333 Traditionally known proteins belonging to the C1b/f sub-complex like CPC1, FAP42 (C1b-  
334 350) and FAP69 (C1b-135) also share similar patterns distinct with significant decrease in *cpc1*,  
335 *pfl5* and *pfl6* but with modest decreases in *pfl6* (Fig. 4D). At first, we were puzzled with this  
336 result of modest decrease in *pfl6* strain since *pfl6* strain is generally assumed to have an unstable  
337 C1 to which the C1b/f region is attached. Therefore, we looked into the article characterizing the  
338 *pfl6* mutant carefully and realized that the C1b/f part remains with the C2 microtubule due to the  
339 diagonal link connecting these structures even other sub-structures like the C1a, c, d and e, and  
340 C2b were missing[14]. This was also mentioned by the authors but has been overlooked in recent  
341 articles. Thus, we concluded that the C1b/f region is partially present in *pfl6* structure in our  
342 purification condition (Fig. 4A). Enolase and HSP70A showed different MS patterns from other  
343 known C1b/f proteins (Fig. S3B), but these proteins were previously shown to be present both in  
344 CP complex and in other compartments of the axoneme, thus the differences are thought to  
345 represent the presence of these proteins in other compartments of the axoneme[36, 38]. Therefore,  
346 the MS profile shared with CPC1, FAP42 and FAP69 was used as a standard for C1b/f proteins.  
347 Among our new CP candidates, FAP246 and CHLREDRAFT\_177061 showed C1b/f-like profile  
348 (Fig. 4D) and thought to be located at this region (Fig. 5 and Table 2). FAP246 was shown to  
349 interact with other C1b/f proteins by immunoprecipitations by Zhao et al., (2019) [37] and our  
350 localization is consistent with this.

351 Hydin is the only protein known to be associated with the C2b region[17, 28]. Based on  
352 previous cross-sectional EM result, this region solubilizes before the C1b/f region in *pfl6* CP  
353 structure[14]. Consistent with this, Hydin was missing in *pfl6* MS result. Hydin was also decreased

354 in *cpc1* compared with WT. From previous studies, the C2b projection is at close proximity to the  
355 C1b sub-structure[15]. Thus, it is possible that the interactions between neighboring sub-structures  
356 C2b and C1b are tighter than previously assumed. In our MS profile, FAP47 showed similar trend  
357 with Hydin (Fig. 4E). In recent MS result, FAP47 also showed elution pattern similar with  
358 Hydin[37]. Based on these results, FAP47 was tentatively assigned to the C2b region in our model  
359 (Fig. 5 and Table 2). In Zhao et al., (2019), FAP49, 72, 154 and 416 were also identified as CP  
360 protein and proposed to form a complex with FAP47 based on immunoprecipitation result [37]. In  
361 our MS result, FAP49, 72, & 154 were detected but not categorized as new CP candidates since  
362 they did not show significant decrease in *pfl5* (Table S1). Detection of these proteins were not  
363 very consistent, but they were present in all *pfl5* triplicate as WT level and completely missing in  
364 all *cpc1* triplicate (Supplementary Excel File 1). The exact reason for this is not apparent, but these  
365 proteins might be loosely attached to the C1b/f region with the aid of FAP47 at the C2b rather than  
366 being stable components of CP. It was shown that the amounts of electron-dense materials around  
367 the CP complex is less in *pfl8* compared with *pfl5* strain[37]. Thus, these loosely anchored  
368 proteins might correspond to these electron-dense materials.

369 KLP1 is known to localize at the C2c/d area[16]. KLP1 was detected in most strains but  
370 in a very small amount in *pfl5* strain. This is consistent with the result of previous cross-section  
371 EM showing that the C2c/d region is stably bound to the C2 microtubule in *pfl6*[14] (Fig. 4A).  
372 Interestingly, PF20 protein which is known to be localized at the “bridge” connecting the C1 and  
373 C2 microtubules showed MS profile similar with that of KLP1 being detected slightly more in  
374 *pfl6* strain compared with *pfl5* result (Fig. 4F). By immunogold labeling EM in previous study,  
375 gold particles were found to be bound to only one of the CP singlets, presumably the C2  
376 microtubule[39]. Our result also suggests that PF20 is associated more tightly to the C2



377 microtubule (Fig. 5). PF20 was previously shown to interact with PF16 protein by yeast two hybrid  
378 study[40] but the MS profile of PF20 was somewhat different from that of PF16 notably the  
379 presence in *pf16* strain. This means that though PF16 and PF20 proteins are interacting, PF16 is  
380 more tightly bound to the C1 microtubule and PF20 to the C2 microtubule. Considering that the  
381 mutation in gene encoding PF16 results in the unstable C1 microtubule, PF16 is thought to be  
382 present on the surface of the C1 microtubule facing the C2 and anchoring the C1 microtubule to  
383 the bridge (Fig. 5). Among our new CP candidates, proteins like FAP65, 70, 75, 99, 123, 147, 171,  
384 239, 244 and 266 showed similar MS profiles with KLP1 and PF20 (Fig. 4F & S3C) and therefore  
385 thought to be present at the C2a, c, d, e and bridge region (Fig. 5 and Table 2). The C2a/e area is  
386 also included since this part is known to be stably attached to the C2 microtubule in *pf16* strain[14].  
387 Previous cryo-ET study has shown that there are protein structures inside the C2 microtubule  
388 tubulin lattice similar to the MIPs in the DMTs [15]. Some of these proteins might correspond to  
389 these inner proteins of the C2 microtubule. FAP65, 70, 75, 147, 171 and 239 were previously  
390 proposed to be somewhere at the C2 microtubule[37] and we were able to further narrow down  
391 the localizations of these proteins. For FAP123, 244 and 266, there was no previous information  
392 about their localization. FAP99 was previously assigned to the C1 microtubule based on the  
393 solubility but there was no direct evidence of localization. Tagging to FAP99 and structural  
394 analysis by cryo-ET in the future work would reveal this point.

395         Though not apparent like other proteins, we also assigned some CP candidates into other  
396 sub-structures. FAP216 did not resemble other known CP proteins' MS profiles, being decreased  
397 in both *pf6* and *cpc1* strains and missing in *pf16* and *pf15* strains (Fig. S3D). This could mean that  
398 FAP216 is a scaffold protein reaching from the C1e to the C1f region (Fig. 5 and Table 2).

399 CHLREDRAFT\_170023 was also assigned to the C1b/f area since it is reduced in *cpcl* strain  
400 result though not significant by ANOVA test (Fig. 5 and Table 2).

401 In our MS profile, some of the known CP proteins also showed MS profiles which were  
402 not readily assigned to certain classes. A traditionally known C1 protein, PP1A, was detected only  
403 in WT sample (Fig. S3D) and therefore we were not able to assign it to certain sub-structures of  
404 the CP. Calmodulin also did not show significant decrease in either of the strain used in our study  
405 (Fig. S3D). As mentioned, Calmodulin is known to be shared with the RS. Thus, the decrease of  
406 Calmodulin is thought to be masked by the signal from RS. Similarly, FAP174 which is a  
407 traditionally known CP protein did not show significant decrease in either of strain by ANOVA  
408 test (Fig. S3D). Zhao *et al.*, also failed to confidently assign this protein to certain location, but  
409 they found that FAP174 was immunoprecipitated by FAP246 which localizes to the C1b/f area  
410 [37]. In our MS profile, FAP174 indeed showed a slight decrease in *cpcl* strain which lacks the  
411 C1b/f region. Based on these results, FAP174 is thought to be located at the C1b/f area (Fig. 5 and  
412 Table 2) along with other compartments of axoneme. Phosphoglycerate mutase was also mapped  
413 to the C1b/f area since this protein is known to work with enolase which was described to localize  
414 at this sub-structure (Fig. 5 and Table 2). There were some remaining CP candidates which we  
415 were unable to assign to certain CP sub-structures (Fig. S3D and Table 2). Most of these proteins  
416 were, however, detected in small amounts and could be the result of false positives. Nonetheless,  
417 our comprehensive MS results using *Chlamydomonas* strains presented new CP protein candidates  
418 and information about the localizations for traditionally known and new CP proteins. These results  
419 will be a foundation for future studies focusing on obtaining the complete CP architecture utilizing  
420 protein tagging and cryo-ET.

421 From our MS profile, we were able to build a more complete model of the localizations of  
422 the CP proteins (Fig. 5). Our model of localizations also gave some insights into regulations of  
423 flagellar motility. FAP125 is a kinesin-like protein newly identified as a CP protein and localized  
424 to the C1c area based on our results. The presence of FAP125 at the C1c area is interesting since  
425 KLP-1, another known CP kinesin, is located at the C2c/d which is at the opposite side of the CP  
426 complex. KLP-1 was proposed to work as a conformational switch in CP[16], and thus,  
427 symmetrical binding of two CP-kinesins onto separate singlet microtubules might play a role in  
428 waveform switching or planar waveform in a coordinated way. Further functional analysis of  
429 FAP125 in future work will reveal this point. Like this example, our model of localizations of CP  
430 proteins can be used to understand how each CP protein is organized and working as a complex.

431 Our results also suggest the existence of interactions between CP proteins across CP sub-  
432 structures. DPY30, MOT17 and FAP81 were shown to localize at different CP sub-structures from  
433 our MS results (Fig. 5). These proteins, however, were shown to form a complex by  
434 immunoprecipitation result[37]. This suggests that larger super-complexes are formed by protein-  
435 protein interactions between neighboring sub-structures rather than several independent small sub-  
436 structures are attached to the CP singlets. Structural analysis of CP complex in a higher resolution  
437 would further reveal this point.

## 438 439 **Conclusion**

440 PCD is a rare but prevalent congenital disease that derives from the impairment of motile  
441 cilia. An insufficient understanding of the protein composition of axonemal complexes directly  
442 affects the success and efficiency of clinical diagnosis of a wide variety of ciliopathies. By using  
443 comprehensive MS analysis of *Chlamydomonas* strains, we have identified novel proteins and  
444 localized them to specific sub-structures of the CP which allows for more informed interpretation

445 of whole exome sequence data and cross-sectional analysis. Through this method, we circumvent  
446 traditional means of protein identification and localization and provide a more comprehensive  
447 insights into the entire making of the CP complex. Such proteomic approach by exploiting mutant  
448 strains would also be applicable for other uninvestigated areas of the axoneme. The novel proteins  
449 identified in this study also make for ideal candidates for further investigation of clinical researches  
450 for PCD.

451

## 452 **Acknowledgements**

453 We thank Dr. Kaustuv Basu at the Facility for Electron Microscopy Research of McGill University  
454 for help in microscope operation and data collection. We are indebted to Mr. Lorne Taylor and Ms.  
455 Amy Ho Yee Wong from MUHC for help for mass spectrometry. This work was supported by  
456 grants from the Natural Sciences and Engineering Research Council of Canada (Discovery Grant  
457 69462), Canada Institute of Health Research (Project Grant 388933) and the Canada Institute for  
458 Advanced Research Arzieli Global Scholars Program and McGill University to KHB. MI is  
459 supported by JSPS Overseas Research Fellowships.

460

## 461 **Conflicts of Interest**

462 The authors declare no conflicts of interest.

463

## 464 **Author Contributions**

465 MI and KHB conceived the project and designed the experiments. DD and MI performed culture  
466 of the cells, purification of microtubule fractions from flagella for MS analysis with the help of

467 KP and RR. MI performed cryo-EM observation with the aid of KHB. DD and MI analyzed the  
468 results. All authors were involved in the manuscript writing process.

469

470 **References**

- 471
- 472 1. Waters, A.M. and P.L. Beales, *Ciliopathies: an expanding disease spectrum*. *Pediatr*  
473 *Nephrol*, 2011. **26**(7): p. 1039-56.
  - 474 2. Wheway, G., L. Nazlamova, and J.T. Hancock, *Signaling through the Primary Cilium*.  
475 *Front Cell Dev Biol*, 2018. **6**: p. 8.
  - 476 3. Lindemann, C.B. and K.A. Lesich, *Flagellar and ciliary beating: the proven and the*  
477 *possible*. *J Cell Sci*, 2010. **123**(Pt 4): p. 519-28.
  - 478 4. Tilley, A.E., et al., *Cilia dysfunction in lung disease*. *Annual review of physiology*, 2015.  
479 **77**: p. 379-406.
  - 480 5. Praveen, K., E.E. Davis, and N. Katsanis, *Unique among ciliopathies: primary ciliary*  
481 *dyskinesia, a motile cilia disorder*. *F1000prime reports*, 2015. **7**: p. 36-36.
  - 482 6. McKenzie, C.W., et al., *Strain-specific differences in brain gene expression in a*  
483 *hydrocephalic mouse model with motile cilia dysfunction*. *Sci Rep*, 2018. **8**(1): p. 13370.
  - 484 7. Popatia, R., K. Haver, and A. Casey, *Primary Ciliary Dyskinesia: An Update on New*  
485 *Diagnostic Modalities and Review of the Literature*. *Pediatric allergy, immunology, and*  
486 *pulmonology*, 2014. **27**(2): p. 51-59.
  - 487 8. Sloboda, R.D. and J.L. Rosenbaum, *Making sense of cilia and flagella*. *The Journal of*  
488 *cell biology*, 2007. **179**(4): p. 575-582.
  - 489 9. Stepanek, L. and G. Pigino, *Microtubule doublets are double-track railways for*  
490 *intraflagellar transport trains*. *Science*, 2016. **352**(6286): p. 721-4.
  - 491 10. DiPetrillo, C.G. and E.F. Smith, *Pcdp1 is a central apparatus protein that binds Ca(2+)-*  
492 *calmodulin and regulates ciliary motility*. *J Cell Biol*, 2010. **189**(3): p. 601-12.
  - 493 11. Kikushima, K., *Central pair apparatus enhances outer-arm dynein activities through*  
494 *regulation of inner-arm dyneins*. *Cell Motil Cytoskeleton*, 2009. **66**(5): p. 272-80.
  - 495 12. Oda, T., et al., *Mechanosignaling between central apparatus and radial spokes controls*  
496 *axonemal dynein activity*. *Journal of Cell Biology*, 2014. **204**(5): p. 807-819.
  - 497 13. Zhang, H. and D.R. Mitchell, *Cpcl, a Chlamydomonas central pair protein with an*  
498 *adenylate kinase domain*. *Journal of Cell Science*, 2004. **117**(18): p. 4179.
  - 499 14. Mitchell, D.R. and W.S. Sale, *Characterization of a Chlamydomonas insertional mutant*  
500 *that disrupts flagellar central pair microtubule-associated structures*. *J Cell Biol*, 1999.  
501 **144**(2): p. 293-304.
  - 502 15. Carbajal-González, B.I., et al., *Conserved structural motifs in the central pair complex of*  
503 *eukaryotic flagella*. *Cytoskeleton*, 2013. **70**(2): p. 101-120.
  - 504 16. Yokoyama, R., et al., *Regulation of flagellar dynein activity by a central pair kinesin*.  
505 *Proceedings of the National Academy of Sciences of the United States of America*, 2004.  
506 **101**(50): p. 17398.
  - 507 17. Lechtreck, K.F., et al., *Mutations in Hydin impair ciliary motility in mice*. *J Cell Biol*,  
508 2008. **180**(3): p. 633-43.
  - 509 18. Johnson, K.A., M.A. Haas, and J.L. Rosenbaum, *Localization of a kinesin-related protein*  
510 *to the central pair apparatus of the Chlamydomonas reinhardtii flagellum*. *J Cell Sci*,  
511 1994. **107** ( Pt 6): p. 1551-6.
  - 512 19. Li, X., et al., *An Indexed, Mapped Mutant Library Enables Reverse Genetics Studies of*  
513 *Biological Processes in Chlamydomonas reinhardtii*. *The Plant cell*, 2016. **28**(2): p. 367-  
514 387.

- 515 20. Teves, M.E., et al., *Mammalian axoneme central pair complex proteins: Broader roles*  
516 *revealed by gene knockout phenotypes*. Cytoskeleton (Hoboken), 2016. **73**(1): p. 3-22.
- 517 21. Dymek, E.E., P.A. Lefebvre, and E.F. Smith, *PF15p is the chlamydomonas homologue of*  
518 *the Katanin p80 subunit and is required for assembly of flagellar central microtubules*.  
519 *Eukaryot Cell*, 2004. **3**(4): p. 870-9.
- 520 22. Smith, E.F. and P.A. Lefebvre, *PF16 encodes a protein with armadillo repeats and*  
521 *localizes to a single microtubule of the central apparatus in Chlamydomonas flagella*. *J*  
522 *Cell Biol*, 1996. **132**(3): p. 359-70.
- 523 23. Goduti, D.J. and E.F. Smith, *Analyses of functional domains within the PF6 protein of the*  
524 *central apparatus reveal a role for PF6 sub-complex members in regulating flagellar*  
525 *beat frequency*. Cytoskeleton (Hoboken), 2012. **69**(3): p. 179-94.
- 526 24. Gorman, D.S. and R.P. Levine, *Cytochrome f and plastocyanin: their sequence in the*  
527 *photosynthetic electron transport chain of Chlamydomonas reinhardi*. *Proc Natl Acad*  
528 *Sci U S A*, 1965. **54**(6): p. 1665-9.
- 529 25. Craige, B., J.M. Brown, and G.B. Witman, *Isolation of Chlamydomonas flagella*. *Current*  
530 *protocols in cell biology*, 2013. **Chapter 3**: p. Unit-3.41.9.
- 531 26. Shevchenko, A., et al., *In-gel digestion for mass spectrometric characterization of*  
532 *proteins and proteomes*. *Nature Protocols*, 2007. **1**: p. 2856.
- 533 27. Brown, J.M., et al., *A FAP46 mutant provides new insights into the function and*  
534 *assembly of the C1d complex of the ciliary central apparatus*. *J Cell Sci*, 2012. **125**(Pt  
535 16): p. 3904-13.
- 536 28. Lechtreck, K.F. and G.B. Witman, *Chlamydomonas reinhardtii hydin is a central pair*  
537 *protein required for flagellar motility*. *J Cell Biol*, 2007. **176**(4): p. 473-82.
- 538 29. Ichikawa, M., et al., *Subnanometre-resolution structure of the doublet microtubule*  
539 *reveals new classes of microtubule-associated proteins*. *Nature communications*, 2017. **8**:  
540 p. 15035-15035.
- 541 30. Pazour, G.J., et al., *Proteomic analysis of a eukaryotic cilium*. *The Journal of cell*  
542 *biology*, 2005. **170**(1): p. 103-113.
- 543 31. Yang, P., et al., *Radial spoke proteins of Chlamydomonas flagella*. *J Cell Sci*, 2006.  
544 **119**(Pt 6): p. 1165-74.
- 545 32. Wargo, M.J., E.E. Dymek, and E.F. Smith, *Calmodulin and PF6 are components of a*  
546 *complex that localizes to the C1 microtubule of the flagellar central apparatus*. *J Cell*  
547 *Sci*, 2005. **118**(Pt 20): p. 4655-65.
- 548 33. Ichikawa, M. and K.H. Bui, *Microtubule Inner Proteins: A Meshwork of Luminal*  
549 *Proteins Stabilizing the Doublet Microtubule*. *BioEssays*, 2018. **40**(3): p. 1700209.
- 550 34. Lechtreck, K.F., T.J. Gould, and G.B. Witman, *Flagellar central pair assembly in*  
551 *Chlamydomonas reinhardtii*. *Cilia*, 2013. **2**(1): p. 15.
- 552 35. Cole, D.G., *Chapter 4 - Intraflagellar Transport*, in *The Chlamydomonas Sourcebook*  
553 *(Second Edition)*, E.H. Harris, D.B. Stern, and G.B. Witman, Editors. 2009, Academic  
554 Press: London. p. 71-113.
- 555 36. Mitchell, B.F., et al., *ATP production in Chlamydomonas reinhardtii flagella by*  
556 *glycolytic enzymes*. *Mol Biol Cell*, 2005. **16**(10): p. 4509-18.
- 557 37. Zhao, L., et al., *Proteome of the central apparatus of a ciliary axoneme*. *J Cell Biol*,  
558 2019. **218**(6): p. 2051-2070.

- 559 38. Bloch, M.A. and K.A. Johnson, *Identification of a molecular chaperone in the eukaryotic*  
560 *flagellum and its localization to the site of microtubule assembly*. J Cell Sci, 1995. **108**  
561 **( Pt 11)**: p. 3541-5.
- 562 39. Smith, E.F. and P.A. Lefebvre, *PF20 gene product contains WD repeats and localizes to*  
563 *the intermicrotubule bridges in Chlamydomonas flagella*. Molecular biology of the cell,  
564 1997. **8**(3): p. 455-467.
- 565 40. Zhang, Z., et al., *A sperm-associated WD repeat protein orthologous to Chlamydomonas*  
566 *PF20 associates with Spag6, the mammalian orthologue of Chlamydomonas PF16*. Mol  
567 Cell Biol, 2002. **22**(22): p. 7993-8004.
- 568 41. Rupp, G., E. O'Toole, and M.E. Porter, *The Chlamydomonas PF6 locus encodes a large*  
569 *alanine/proline-rich polypeptide that is required for assembly of a central pair projection*  
570 *and regulates flagellar motility*. Mol Biol Cell, 2001. **12**(3): p. 739-51.
- 571 42. Bernstein, M., et al., *A new kinesin-like protein (Klp1) localized to a single microtubule*  
572 *of the Chlamydomonas flagellum*. J Cell Biol, 1994. **125**(6): p. 1313-26.
- 573 43. Yang, P., et al., *Protein phosphatases PP1 and PP2A are located in distinct positions in*  
574 *the Chlamydomonas flagellar axoneme*. J Cell Sci, 2000. **113 ( Pt 1)**: p. 91-102.
- 575 44. Rao, V.G., et al., *Myc-binding protein orthologue interacts with AKAP240 in the central*  
576 *pair apparatus of the Chlamydomonas flagella*. BMC Cell Biol, 2016. **17**(1): p. 24.  
577  
578



579 **Table 1. Summary of MS results of traditionally known CP proteins.**

| Names              | Uniprot ID | WT<br>Exclusive unique<br>peptide count<br>(Quantitative<br>values after<br>normalization) | <i>pf15</i><br>Exclusive<br>unique<br>peptide count<br>(Quantitative<br>values after<br>normalization) | <i>pf15</i> /WT<br>ratio (%)<br>(Quantitative<br>values were<br>used) | <i>p</i> -values<br>(WT vs <i>pf15</i> ) | Localizations | References   |
|--------------------|------------|--------------------------------------------------------------------------------------------|--------------------------------------------------------------------------------------------------------|-----------------------------------------------------------------------|------------------------------------------|---------------|--------------|
| Hydin              | A8HQ52     | 68, 87, 27<br>(68, 75, 53)                                                                 | 0, 0, 0<br>(0, 0, 0)                                                                                   | 0.0                                                                   | 0.00059                                  | C2b           | [17, 28]     |
| FAP42<br>(C1b-350) | A8J614     | 63, 59, 36<br>(68, 50, 69)                                                                 | 2, 2, 2<br>(2, 2, 2)                                                                                   | 3.6                                                                   | 0.00062                                  | C1b/f         | [36]         |
| PF6                | Q9ATK5     | 53, 65, 32<br>(65, 72, 82)                                                                 | 4, 3, 5<br>(5, 3, 5)                                                                                   | 6.0                                                                   | 0.00016                                  | C1a/e         | [32, 41]     |
| CPC1               | Q6J4H1     | 55, 57, 30<br>(76, 66, 74)                                                                 | 6, 7, 4<br>(7, 8, 4)                                                                                   | 8.8                                                                   | < 0.00010                                | C1b/f         | [32]         |
| FAP54              | A8J666     | 46, 61, 27<br>(44, 48, 49)                                                                 | 0, 0, 1<br>(0, 0, 1)                                                                                   | 0.7                                                                   | < 0.00010                                | C1d           | [10, 27]     |
| FAP46              | A8ICS9     | 40, 50, 35<br>(52, 44, 78)                                                                 | 1, 0, 2<br>(1, 0, 3)                                                                                   | 2.5                                                                   | 0.0052                                   | C1d           | [10, 27]     |
| FAP74              | D4P3R7     | 32, 42, 15<br>(34, 32, 33)                                                                 | 0, 0, 1<br>(0, 0, 1)                                                                                   | 1.0                                                                   | < 0.00010                                | C1d           | [10, 27]     |
| FAP69<br>(C1b-135) | A8IF19     | 16, 24, 11<br>(17, 23, 26)                                                                 | 1, 2, 2<br>(1, 2, 2)                                                                                   | 8.3                                                                   | 0.0023                                   | C1b/f         | [36]         |
| PF16               | A8J0A5     | 17, 19, 16<br>(34, 69, 74)                                                                 | 1, 1, 1<br>(1, 1, 1)                                                                                   | 1.9                                                                   | 0.010                                    | C1            | [22]         |
| HSP70*             | A8JEU4     | 14, 22, 6<br>(17, 18, 10)                                                                  | 5, 5, 2<br>(7, 6, 2)                                                                                   | 33                                                                    | 0.028                                    | C1b/f         | [36, 38]     |
| KLP1               | A8I9T2     | 15, 16, 3<br>(17, 13, 7)                                                                   | 1, 2, 1<br>(1, 2, 2)                                                                                   | 15                                                                    | 0.025                                    | C2c/d         | [16, 42]     |
| FAP101             | A8I345     | 13, 16, 14<br>(17, 20, 30)                                                                 | 0, 0, 1<br>(0, 0, 1)                                                                                   | 1.6                                                                   | 0.0055                                   | C1a/e         | [32]         |
| Enolase*           | A8JH98     | 17, 12, 9<br>(23, 31, 17)                                                                  | 7, 9, 6<br>(9, 11, 8)                                                                                  | 39                                                                    | 0.017                                    | C1b/f         | [36]         |
| FAP221<br>(Pcdp1)  | A8J6X7     | 7, 9, 7<br>(6, 5, 12)                                                                      | 0, 0, 0<br>(0, 0, 0)                                                                                   | 0.0                                                                   | 0.015                                    | C1d           | [10, 27]     |
| FAP114<br>(C1a-32) | Q45QX5     | 7, 7, 5<br>(13, 8, 16)                                                                     | 0, 0, 0<br>(0, 0, 0)                                                                                   | 0.0                                                                   | 0.0081                                   | C1a/e         | [32]         |
| FAP119<br>(C1a-34) | Q45QX4     | 7, 7, 3<br>(8, 7, 5)                                                                       | 0, 0, 1<br>(0, 0, 1)                                                                                   | 5.1                                                                   | 0.0034                                   | C1a/e         | [32]         |
| FAP297<br>(WDR93)  | A8HQE0     | 4, 8, 2<br>(6, 6, 3)                                                                       | 0, 0, 0<br>(0, 0, 0)                                                                                   | 0.0                                                                   | 0.0040                                   | C1d           | [27]         |
| PF20               | A8ITB4     | 3, 7, 2<br>(3, 6, 3)                                                                       | 1, 0, 0<br>(1, 0, 0)                                                                                   | 9.9                                                                   | 0.028                                    | C1-C2 bridge  | [39]         |
| PP1a*              | Q9XGU3     | 2, 2, 1<br>(2, 2, 2)                                                                       | 0, 0, 0<br>(0, 0, 0)                                                                                   | 0.0                                                                   | < 0.00010                                | C1            | [43]         |
| FAP174             | A8I439     | 1, 2, 4<br>(2, 4, 13)                                                                      | 3, 2, 4<br>(5, 2, 8)                                                                                   | 79                                                                    | 0.75                                     | C2<br>C1b/f   | [44]<br>[37] |
| Calmodulin*        | A8IDP6     | 1, 3, 3<br>(1, 2, 7)                                                                       | 4, 4, 4<br>(6, 5, 5)                                                                                   | 160                                                                   | 0.34                                     | C1a/e         | [31, 32]     |
| FAP227<br>(C1a-18) | Q45QX6     | n.d.                                                                                       | n.d.                                                                                                   | -                                                                     | -                                        | C1a/e         | [32]         |

580  
581 Three values from biological triplicate for both exclusive unique peptide count and quantitative  
582 values are shown.

583 Asterisks denote that these proteins are shared with other compartments of the axoneme.

584  
585  
586  
587  
588

589 **Table 2. MS results of new CP proteins and their localizations inside the CP complex.**

| Names                   | Uniprot ID | WT exclusive unique peptide counts (quantitative values) | <i>pf15</i> exclusive unique peptide counts (quantitative values) | <i>pf15</i> /WT ratio (%) (quantitative values were used) | <i>p</i> -values (WT vs <i>pf15</i> ) | Localizations                                |
|-------------------------|------------|----------------------------------------------------------|-------------------------------------------------------------------|-----------------------------------------------------------|---------------------------------------|----------------------------------------------|
| CHLREDRAFT_150638       | A8J566     | 1, 5, 0 (1, 4, 0)                                        | 0, 0, 0 (0, 0, 0)                                                 | 0                                                         | 0.23                                  | C1a/e (this study)                           |
| CHLREDRAFT_170023       | A8IMQ8     | 3, 9, 0 (3, 6, 0)                                        | 0, 0, 0 (0, 0, 0)                                                 | 0                                                         | 0.17                                  | C1b/f (this study)                           |
| CHLREDRAFT_177061       | A8J9A4     | 7, 7, 2 (6, 5, 3)                                        | 0, 0, 1 (0, 0, 1)                                                 | 7.1                                                       | 0.0098                                | C1b/f (this study)                           |
| DPY30**                 | A8J1X7     | 1, 2, 1 (1, 1, 2)                                        | 0, 0, 0 (0, 0, 0)                                                 | 0.0                                                       | 0.0041                                | C1a/e ([37] & this study)                    |
| EF-3                    | A8ISZ1     | 4, 2, 1 (4, 1, 2)                                        | 0, 0, 0 (0, 0, 0)                                                 | 0.0                                                       | 0.047                                 | Not assigned                                 |
| FAP7*                   | A8IVW2     | 14, 16, 7 (26, 33, 28)                                   | 1, 0, 1 (1, 0, 1)                                                 | 2.6                                                       | 0.00025                               | C1a/e (this study)                           |
| FAP47**                 | A8IPW8     | 22, 35, 15 (23, 27, 26)                                  | 0, 0, 0 (0, 0, 0)                                                 | 0.0                                                       | < 0.00010                             | C2b (this study)                             |
| FAP65*                  | A8JFU2     | 13, 23, 10 (12, 19, 16)                                  | 0, 0, 0 (0, 0, 0)                                                 | 0.0                                                       | 0.0016                                | C2a,c,d,e and Bridge (this study)            |
| FAP70*                  | A8I7W0     | 12, 22, 11 (14, 26, 23)                                  | 0, 1, 0 (0, 1, 0)                                                 | 33                                                        | 0.0053                                | C2a,c,d,e and Bridge (this study)            |
| FAP75*                  | A8HYW3     | 13, 19, 8 (13, 16, 15)                                   | 0, 1, 1 (0, 1, 1)                                                 | 5.0                                                       | < 0.00010                             | C2a,c,d,e and Bridge (this study)            |
| FAP76**                 | A8J128     | 24, 26, 14 (26, 23, 26)                                  | 0, 1, 0 (0, 1, 0)                                                 | 1.5                                                       | < 0.00010                             | C1d (this study)                             |
| FAP81*                  | A8IPC1     | 23, 27, 12 (24, 24, 23)                                  | 0, 0, 0 (0, 0, 0)                                                 | 0.0                                                       | < 0.00010                             | C1d (this study)                             |
| FAP92*                  | A8HR45     | 28, 30, 17 (29, 23, 36)                                  | 0, 0, 0 (0, 0, 0)                                                 | 0.0                                                       | 0.0017                                | C1d (this study)                             |
| FAP99**                 | A8IUG5     | 9, 13, 1 (10, 9, 2)                                      | 0, 0, 0 (0, 0, 0)                                                 | 0.0                                                       | 0.060                                 | C1 [37]<br>C2a,c,d,e and Bridge (this study) |
| FAP105*                 | A8IKV8     | 3, 5, 0 (3, 4, 0)                                        | 0, 0, 0 (0, 0, 0)                                                 | 0.0                                                       | 0.12                                  | C1d (this study)                             |
| FAP108*                 | A8IPA9     | 2, 3, 1 (2, 2, 2)                                        | 0, 0, 0 (0, 0, 0)                                                 | 0.0                                                       | 0.00090                               | C1d (this study)                             |
| FAP123*                 | A8IEJ6     | 4, 3, 0 (4, 2, 0)                                        | 0, 0, 0 (0, 0, 0)                                                 | 0.0                                                       | 0.16                                  | C2a,c,d,e and Bridge (this study)            |
| FAP125*                 | A8IY87     | 14, 18, 9 (15, 18, 16)                                   | 0, 0, 0 (0, 0, 0)                                                 | 0.0                                                       | < 0.00010                             | C1c (this study)                             |
| FAP147*                 | A8IT32     | 7, 10, 3 (6, 7, 7)                                       | 0, 0, 0 (0, 0, 0)                                                 | 0.0                                                       | < 0.00010                             | C2a,c,d,e and Bridge (this study)            |
| FAP171*                 | A8IUF4     | 4, 9, 2 (4, 7, 3)                                        | 1, 0, 0 (1, 0, 0)                                                 | 8.4                                                       | 0.029                                 | C2a,c,d,e and Bridge (this study)            |
| FAP173                  | A8JAF7     | 3, 3, 1 (4, 2, 2)                                        | 0, 0, 0 (0, 0, 0)                                                 | 0.0                                                       | 0.012                                 | Not assigned                                 |
| FAP194*                 | A8J5U4     | 9, 13, 4 (10, 10, 7)                                     | 0, 0, 0 (0, 0, 0)                                                 | 0.0                                                       | 0.0013                                | C2a,c,d,e and Bridge (this study)            |
| FAP199                  | A8J1E6     | 1, 2, 3 (1, 1, 7)                                        | 0, 0, 0 (0, 0, 0)                                                 | 0.0                                                       | 0.19                                  | Not assigned                                 |
| FAP209                  | A8J100     | 6, 8, 3 (6, 5, 5)                                        | 0, 1, 0 (0, 1, 0)                                                 | 6.7                                                       | 0.00086                               | C1c (this study)                             |
| FAP216*                 | A8JGM3     | 12, 16, 4 (13, 13, 7)                                    | 0, 0, 0 (0, 0, 0)                                                 | 0.0                                                       | 0.0064                                | C1e to f? (this study)                       |
| FAP219                  | A8J9I0     | 5, 7, 1 (5, 5, 2)                                        | 0, 0, 0 (0, 0, 0)                                                 | 0.0                                                       | 0.022                                 | C1c (this study)                             |
| FAP225*                 | A8HNF2     | 14, 19, 4 (14, 22, 7)                                    | 0, 0, 0 (0, 0, 0)                                                 | 0.0                                                       | 0.034                                 | C2a,c,d,e and Bridge (this study)            |
| FAP239*                 | A8J319     | 0, 5, 2 (0, 3, 3)                                        | 0, 0, 0 (0, 0, 0)                                                 | 0.0                                                       | 0.12                                  | C2a,c,d,e and Bridge (this study)            |
| FAP244                  | A8IZG0     | 12, 14, 5 (14, 10, 12)                                   | 0, 0, 0 (0, 0, 0)                                                 | 0.0                                                       | 0.00069                               | C2a,c,d,e and Bridge (this study)            |
| FAP246**                | A8HNZ7     | 7, 6, 3 (7, 6, 5)                                        | 0, 0, 0 (0, 0, 0)                                                 | 0.0                                                       | 0.00069                               | C1b/f ([37] & this study)                    |
| FAP266*                 | A8JB69     | 4, 5, 2 (4, 3, 3)                                        | 1, 1, 0 (1, 1, 0)                                                 | 23                                                        | 0.0043                                | C2a,c,d,e and Bridge (this study)            |
| FAP279                  | A8HWC6     | 5, 7, 1 (6, 4, 2)                                        | 0, 0, 0 (0, 0, 0)                                                 | 0.0                                                       | 0.029                                 | C1d (this study)                             |
| FAP289*                 | A8JCZ9     | 8, 12, 4 (9, 9, 8)                                       | 0, 0, 0 (0, 0, 0)                                                 | 0.0                                                       | < 0.00010                             | C1d (this study)                             |
| FAP312*                 | A8IUV6     | 2, 5, 1 (2, 3, 2)                                        | 0, 0, 0 (0, 0, 0)                                                 | 0.0                                                       | 0.0066                                | Not assigned                                 |
| FAP348*                 | A8JBI2     | 2, 3, 2 (2, 2, 3)                                        | 0, 0, 0 (0, 0, 0)                                                 | 0.0                                                       | 0.0095                                | C1a/e (this study)                           |
| FAP412*                 | A8JGL8     | 6, 9, 0 (6, 6, 0)                                        | 0, 0, 0 (0, 0, 0)                                                 | 0.0                                                       | 0.12                                  | Not assigned                                 |
| MOT17*                  | A8J798     | 3, 4, 3 (3, 2, 7)                                        | 0, 0, 0 (0, 0, 0)                                                 | 0.0                                                       | 0.044                                 | C1c (this study)                             |
| Phosphoglycerate mutase | A8HVVU5    | 4, 10, 0 (4, 7, 0)                                       | 0, 0, 0 (0, 0, 0)                                                 | 0.0                                                       | 0.15                                  | C1b/f? (this study)                          |

590 \*: CP candidates shared with [37].

591 \*\*: CP proteins which were confirmed by [37].

592 DPY30 was not originally in our CP candidates but shown here since it was confirmed as CP protein.

593 **Figure legends**

594

595

596 **Figures 1: Schematic diagrams of the axonemal (A) and the CP (B) viewed from the base of**

597 **flagella.** The axoneme of cilia and flagella consists of nine DMTs radially surrounding the CP

598 complex. The DMTs are decorated with ODA and IDA complexes and RS complexes. IFT takes

599 place at the space between the membrane and the DMTs. The CP consists of two structurally

600 dimorphic singlets termed as the C1 and C2 connected by the bridge. Several distinct sub-

601 structures bind around the singlets with a repeating pattern along the axis of the

602 axoneme. Diagonal link is also known to connect the C2 with the C1b region. The model of CP

603 structure is adopted from [15].

604

605 **Figure 2: Preparation of microtubule fraction for MS.**

606 (A) A schematic diagram of sequential purification of the axoneme. Flagella were demembrated

607 using a detergent NP-40 following isolation from *Chlamydomonas* cells. Demembrated

608 axoneme was incubated with ADP and ATP to induce splitting of the DMTs and the CP and

609 then treated with 0.6 M NaCl twice to shed large protein complexes such as dyneins. (B) SDS-

610 PAGE gel demonstrating protein shedding after sequential purification. The signal

611 of dynein heavy chain band (> 500 kDa) was decreased significantly after NaCl treatments. In

612 contrast, the tubulin band which is a main component of the CP and DMTs showed little change

613 after sequential purification. (C) A typical cryo-EM image of purified sample showing the

614 presence of singlet microtubule from the CP. In our cryo-electron micrographs of our

615 purified microtubule fraction, both DMTs (orange arrowheads) and singlet microtubule from the

616 CP (red arrowhead) with characteristic protruding sub-structures were observed (see also Fig.

617 S1). Boxed area of the micrograph is shown in the right panel. The plot profile of yellow box

618 area was generated by ImageJ and the distances between the peaks (red dots) were measured.  
619 The averaged distance between the protrusions was 16.7 nm which is consistent with the known  
620 repeating unit of the CP[15]. There were more numbers of the DMTs compared with singlets  
621 from the CP reflecting the stoichiometry inside the axoneme. Scale bar represents 100 nm.

622

### 623 **Figure 3: Identification of new CP proteins by MS.**

624 (A) Schematic diagrams of the axoneme structures from WT and *pfl5* *Chlamydomonas* strains  
625 and expected microtubule structures obtained from either axoneme structure. The DMTs and CP  
626 complexes were purified from WT flagella while only DMTs are expected to be purified  
627 from *pfl5* flagella. Obtained microtubule fractions from WT and *pfl5* were analyzed by MS and  
628 the results were compared. (B) SDS-PAGE result of sequential purification of microtubule  
629 fraction from *pfl5* flagella showing similar pattern with that of WT flagella. (C) Volcano plot of  
630 comparison of WT and *pfl5* mass spectrometry results. Changes in a protein abundance  
631 between WT ( $n = 3$ ) and *pfl5* ( $n = 3$ ) results were plotted on a volcano plot. Dashed red line  
632 indicates the significance threshold of  $p < 0.05$  and proteins meet this criterion are shown in  
633 green. Triangle dots represent completely missing proteins in either WT or *pfl5* result. Two-and  
634 four-fold changes are shown by the orange and blue dashed lines, respectively. There were  
635 more proteins completely missing in *pfl5* results while many others showed more than two-  
636 fold decrease in *pfl5* results. (D) Plot of fold changes of proteins categorized into different  
637 groups. Proteins identified by MS were arranged by groups (Tubulins; RS proteins; IFT complex  
638 proteins; IFT dynein; IFT kinesin; axonemal dyneins; dynein regulatory complex; MIP  
639 candidates; known CP proteins) and fold change between WT and *pfl5* results of each protein  
640 was plotted. Two-and four-fold changes are shown by the orange and blue dashed

641 lines, respectively. Green lines indicate the median value for each category. Statistical  
642 significance compared with tubulin result was examined by ANOVA followed by Dunnett's  
643 multiple comparisons test. Among these classes, only known CP protein class was significantly  
644 reduced with  $p$ -value of 0.0005. Fold changes of our new CP protein candidates are also shown  
645 at the rightmost column. Red line represents proteins that were completely missing in *pf15*.  
646 Proteins included in each class are listed in Tables 1 and 2, and Supplementary Excel File 2.  
647

648 **Figure 4: MS analyses using *Chlamydomonas* mutant strains lacking CP sub-structures.**

649 (A) Schematic diagrams of CP structures from mutants lacking sub-structures of CP.  
650 Sub-structures of CP which are missing in *pf6*, *cpc1* and *pf16* strains are shown in dashed lines.  
651 *pf6* strain is missing the C1a/e structure (formerly the C1a), *cpc1* strain lacks the C1b/f structure  
652 (formerly the C1b) while *pf16* strain has an unstable C1 structure. The C1b/f region is shown  
653 translucent since this region can remain attached to the C2 microtubule with the diagonal  
654 link[14]. (B-F) MS profiles of CP proteins and their possible localizations. Detected levels of  
655 proteins were compared among strains (WT, *pf6*, *cpc1*, *pf16* and *pf15*). Mean values  
656 of normalized quantitative values of each CP protein are shown (error bars represent SD for  
657 biological triplicate). Known CP proteins (black) that have been localized to specific sub-  
658 complexes showed similar MS profiles. These proteins were used as references to assign newly  
659 identified CP proteins (red) to certain sub-structures, such as the C1a/e area (B), the C1c/d area  
660 (C), the C1b/f area (D), the C2b area (E), and the C2a, c, d, e & bridge area (F). Known CP  
661 protein PF16 (blue) was also categorized into the C1c/d region based on the MS  
662 profile. Statistical test was performed by ANOVA followed by Dunnett's multiple comparisons

663 test comparing with WT values ( $*p < 0.05$ ;  $**p < 0.01$ ;  $***p < 0.001$ ;  $****p < 0.0001$ ; n.s., not  
664 significant; n.d., not detected). Plots not shown here are presented in Fig. S3.

665

666 **Figure 5: Summary of localizations of known and new CP proteins.**

667 Proteins are mapped to CP sub-structures (C1a/e; C1c; C1d; C1b/f; C2b; and C2a, c, d, e &  
668 bridge areas) based on our MS profiles. Traditionally known CP proteins are shown in black and  
669 new CP proteins are shown in red. Known CP proteins (PF16 and FAP174) which were assigned  
670 to certain sub-structures in our work are highlighted in blue. FAP297 was proposed to localize at  
671 C1d region, but it is thought to be at the interface between C1d and f from our MS result.  
672 Asterisks denote the proteins possibly shared with other axonemal structures.

673

674 **Supplementary Fig. 1: Additional cryo-EM images showing singlets from the CP.**

675 In our purified microtubule fractions, we occasionally observed singlet microtubules from the CP  
676 (red arrowheads) with characteristic appendages along with the DMTs (orange arrowheads).  
677 Scale bar, 100 nm.

678

679 **Supplementary Fig. 2: Purification of microtubule fractions from *cpc1*, *pf6* and *pf16*  
680 strains, and comparison of MS results with WT.**

681 (A and B) SDS-PAGE result of sequential purification of microtubule fraction from *cpc1* flagella  
682 and a volcano plot comparing *cpc1* result with WT result. (C and D) SDS-PAGE gel of  
683 purification from *pf6* axoneme and a volcano plot of *pf6* MS result compared with WT result. (E  
684 and F) *pf16* strain SDS-PAGE result and its MS result on a volcano plot compared with WT.  
685 Dashed red line indicates the significance threshold ( $p < 0.05$ ) and proteins showed significant

686 change are shown in green. Triangle dots represent completely missing proteins in either mutant  
687 results or WT result. Orange and blue dashed lines indicate two- and four-fold  
688 changes, respectively.

689

690 **Supplementary Fig. 3: Additional MS profiles for other CP proteins.**

691 (A) MS profiles of proteins previously proposed to be localized at the C1d region and new CP  
692 proteins assigned to the C1d area. FAP297 was previously proposed to be a component of the  
693 C1d sub-structure, but its MS profile was different from other known C1d proteins and FAP297  
694 is thought to be localized at a slightly different location. (B) MS profiles of CP proteins known to  
695 localize at the C1b/f area. HSP70 and enolase are known to be localized at the C1b/f, but MS  
696 profiles of these proteins were different from other known C1b/f proteins, possibly because these  
697 proteins are also shared with other axonemal complexes. (C) MS profiles of other new CP  
698 proteins mapped to the C2a, c, d, e and bridge area. (D) MS profiles of CP proteins which were  
699 not readily assigned to certain regions. Known CP protein Calmodulin, which is also shared with  
700 RS did not show significant change in either of strain tested here. Known CP protein FAP174  
701 also showed similar trend with Calmodulin and thus thought to be shared with other axonemal  
702 complexes. Traditionally known CP proteins are shown in black and new CP proteins are shown  
703 in red through this figure.

704

705

706

707

708

709

710

711

712

713 **Supplementary Table 1. List of proteins only identified in Zhao *et al.*, (2019) [1].**

| Names  | Uniprot ID | WT<br>exclusive unique peptide<br>counts (quantitative values) | <i>pf15</i><br>exclusive unique peptide<br>counts (quantitative values) | Comments                                     |
|--------|------------|----------------------------------------------------------------|-------------------------------------------------------------------------|----------------------------------------------|
| FAP39  | A8J0V2     | 6, 10, 4 (8, 9, 7)                                             | 4, 5, 4 (8, 10, 4)                                                      | Not reduced in <i>pf15</i> in all triplicate |
| FAP49  | A8J4C7     | 0, 0, 0 (10, 0, 0)                                             | 0, 0, 0 (11, 9, 9)                                                      | Not reduced in <i>pf15</i> in all triplicate |
| FAP72  | A8J4C5     | 0, 0, 0 (9, 2, 0)                                              | 1, 2, 1 (11, 9, 9)                                                      | Not reduced in <i>pf15</i> in all triplicate |
| FAP139 | A8J134     | 11, 16, 2 (12, 15, 5)                                          | 8, 9, 8 (10, 16, 8)                                                     | Not reduced in <i>pf15</i> in all triplicate |
| FAP154 | A8J4C9     | 6, 0, 1 (17, 2, 7)                                             | 6, 6, 7 (19, 16, 20)                                                    | Not reduced in <i>pf15</i> in all triplicate |
| FAP178 | A8ID60     | 0, 2, 0 (0, 2, 0)                                              | 0, 0, 0 (0, 0, 0)                                                       | Only detected in one of the triplicate of WT |
| FAP275 | A8J870     | 0, 1, 0 (0, 1, 0)                                              | 0, 0, 0 (0, 0, 0)                                                       | Only detected in one of the triplicate of WT |
| FAP286 | A8IKJ2     | 0, 0, 0 (0, 0, 0)                                              | 0, 0, 0 (0, 0, 0)                                                       | Not detected                                 |
| FAP345 | A8JED5     | 1, 1, 2 (1, 1, 3)                                              | 0, 0, 0 (0, 0, 0)                                                       | Not significant                              |
| FAP380 | A8HP72     | 2, 1, 0 (2, 1, 0)                                              | 1, 0, 0 (1, 0, 0)                                                       | Not significant                              |
| FAP411 | A8J4L4     | 0, 0, 0 (0, 0, 0)                                              | 0, 0, 0 (0, 0, 0)                                                       | Not detected                                 |
| FAP413 | A8J3X1     | 0, 0, 2 (0, 0, 5)                                              | 0, 0, 0 (0, 0, 0)                                                       | Not significant                              |
| FAP414 | A8J0A0     | 0, 2, 0 (0, 1, 0)                                              | 1, 0, 0 (1, 0, 0)                                                       | Not significant                              |
| FAP415 | A8I0B9     | 0, 0, 0 (0, 0, 0)                                              | 0, 0, 0 (0, 0, 0)                                                       | Not detected                                 |
| FAP416 | A8IQU8     | 0, 0, 0 (0, 0, 0)                                              | 0, 0, 0 (0, 0, 0)                                                       | Not detected                                 |
| FAP417 | A8IBK1     | 1, 0, 0 (1, 0, 0)                                              | 0, 1, 0 (0, 1, 0)                                                       | Only detected in one of the triplicate of WT |
| DIP13  | Q9XF62     | 0, 0, 0 (0, 0, 0)                                              | 0, 0, 0 (0, 0, 0)                                                       | Not detected                                 |
| NAP    | O24426     | 0, 0, 0 (0, 0, 0)                                              | 0, 0, 0 (0, 0, 0)                                                       | Not detected                                 |

714 Three values from biological triplicate for both exclusive unique peptide count and quantitative  
715 values are shown.

716

717 1. Zhao, L., et al., *Proteome of the central apparatus of a ciliary axoneme*. J Cell Biol, 2019.  
718 **218(6):** p. 2051-2070.

719



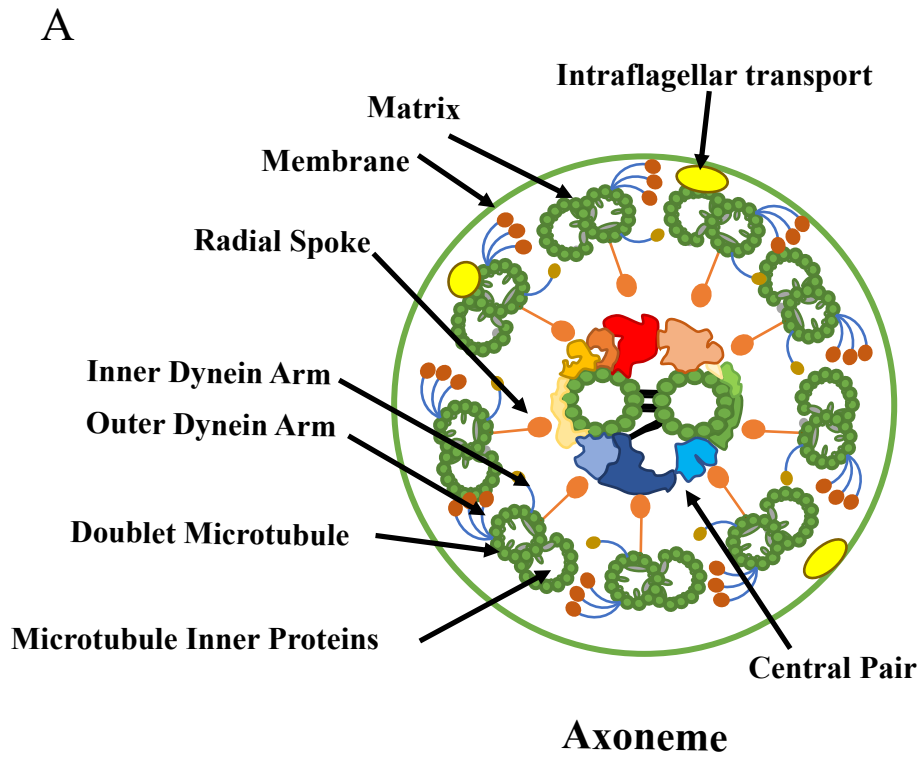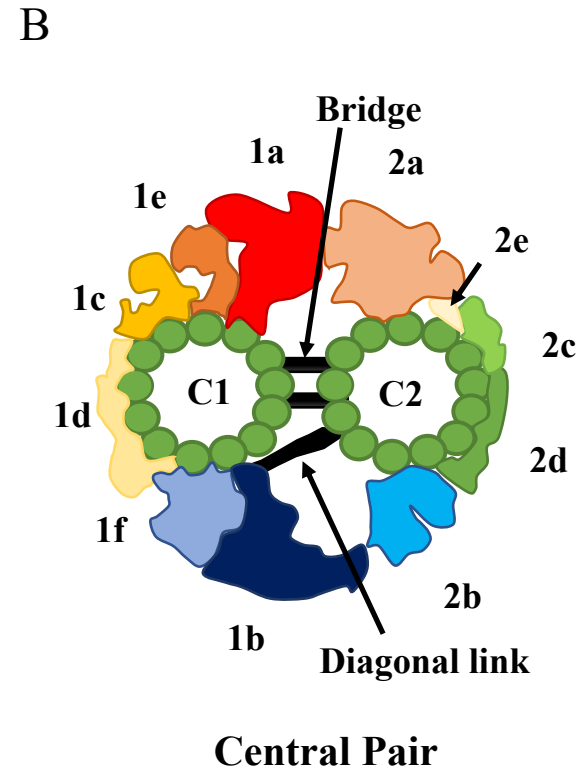

Figure 1

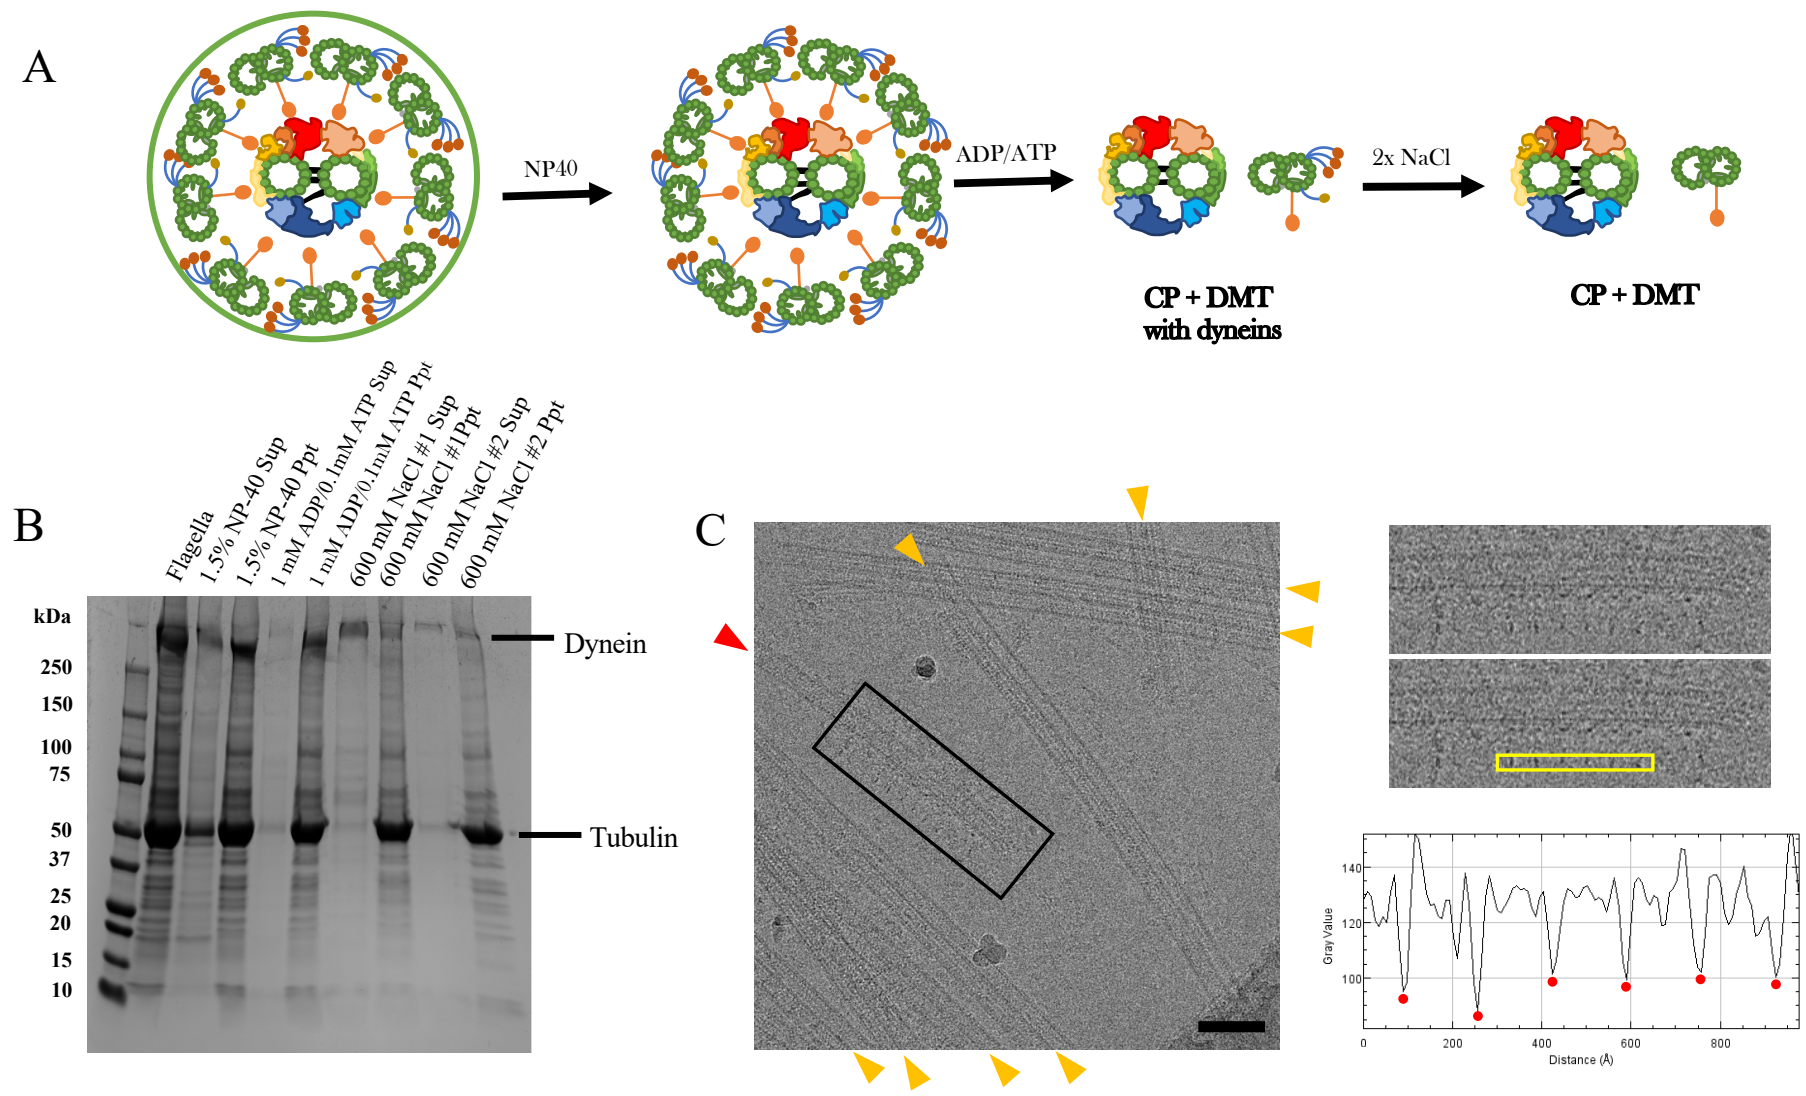

Figure 2

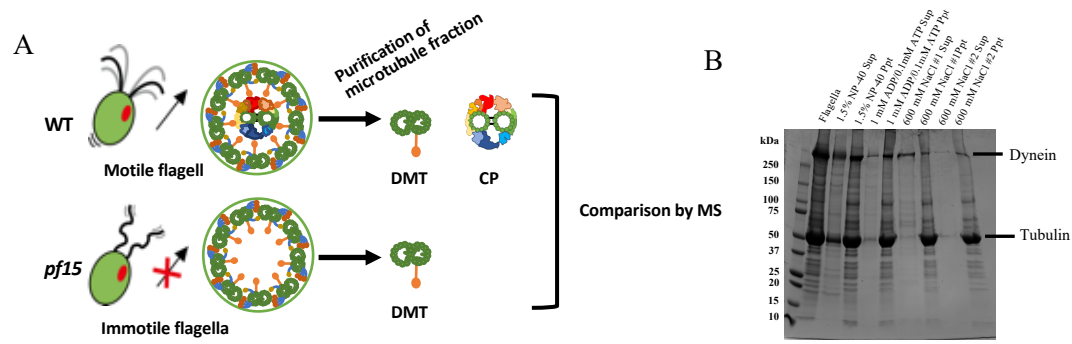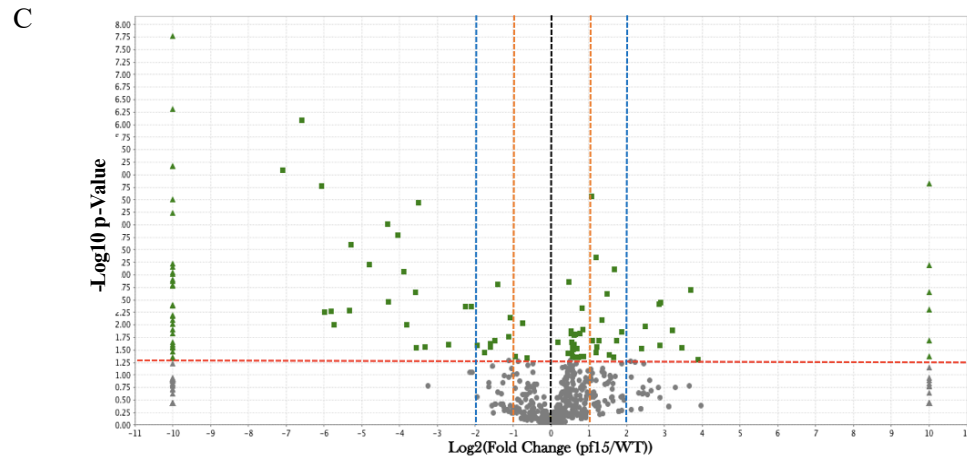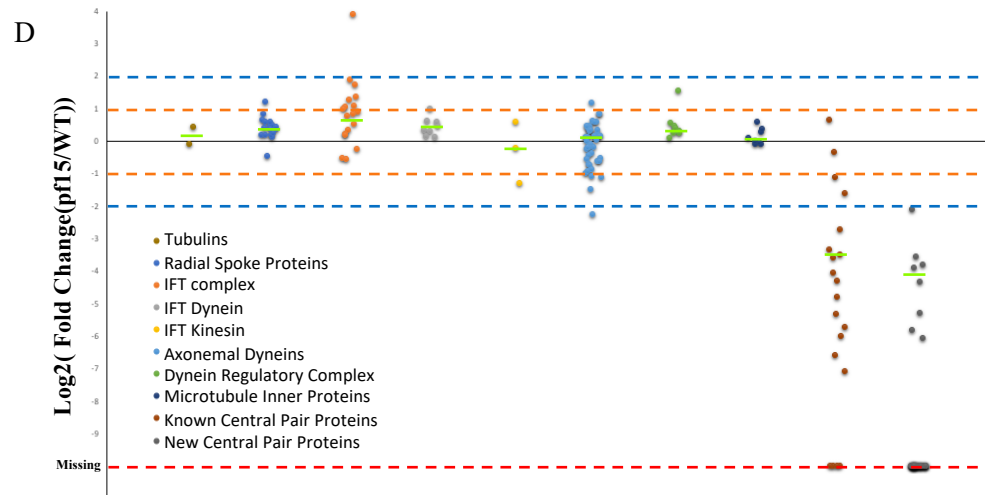

Figure 3

A

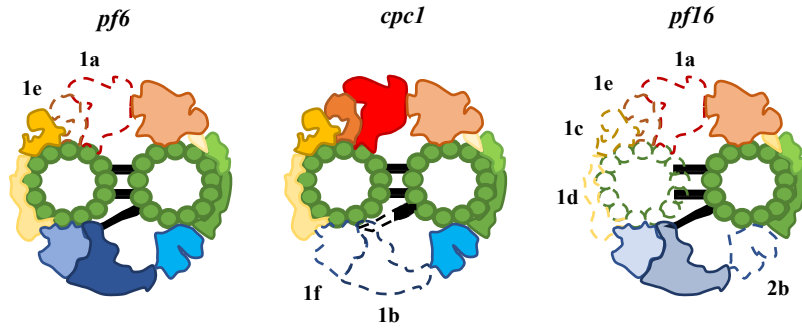

B

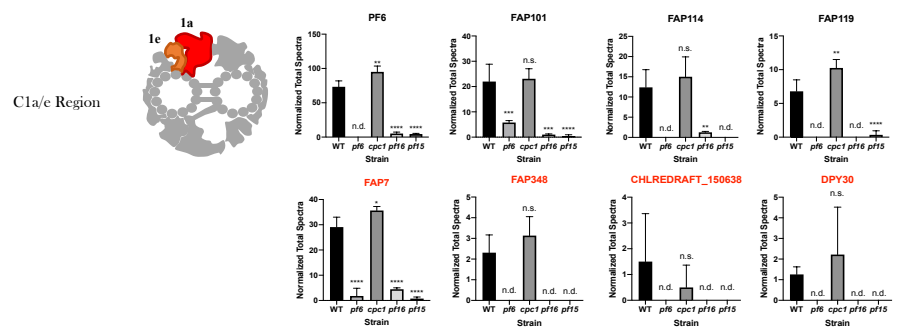

D

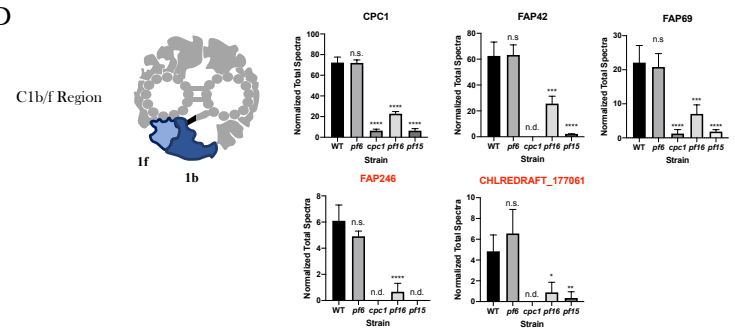

C

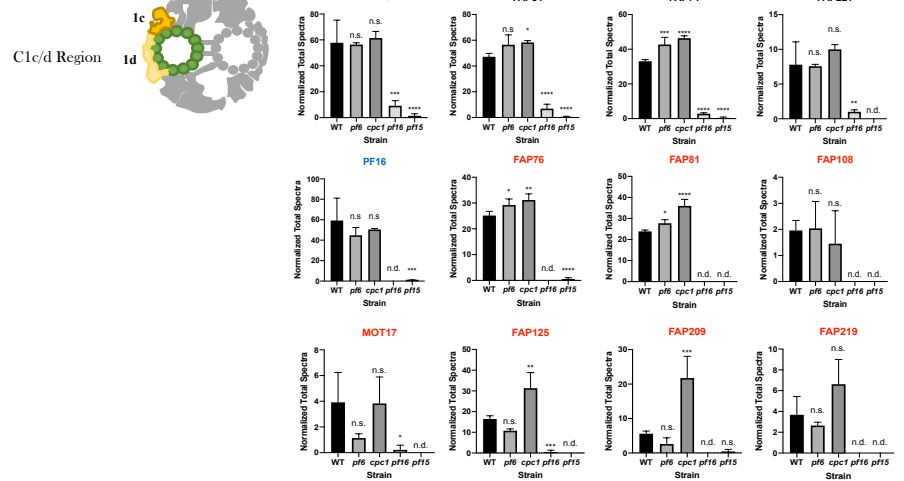

E

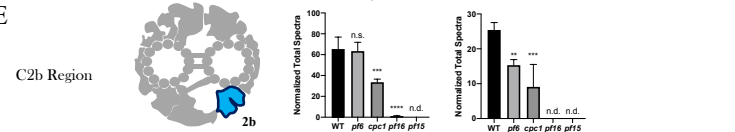

F

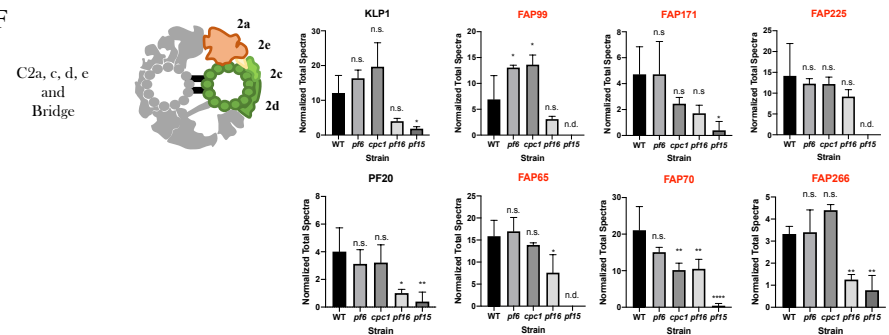

Figure 4

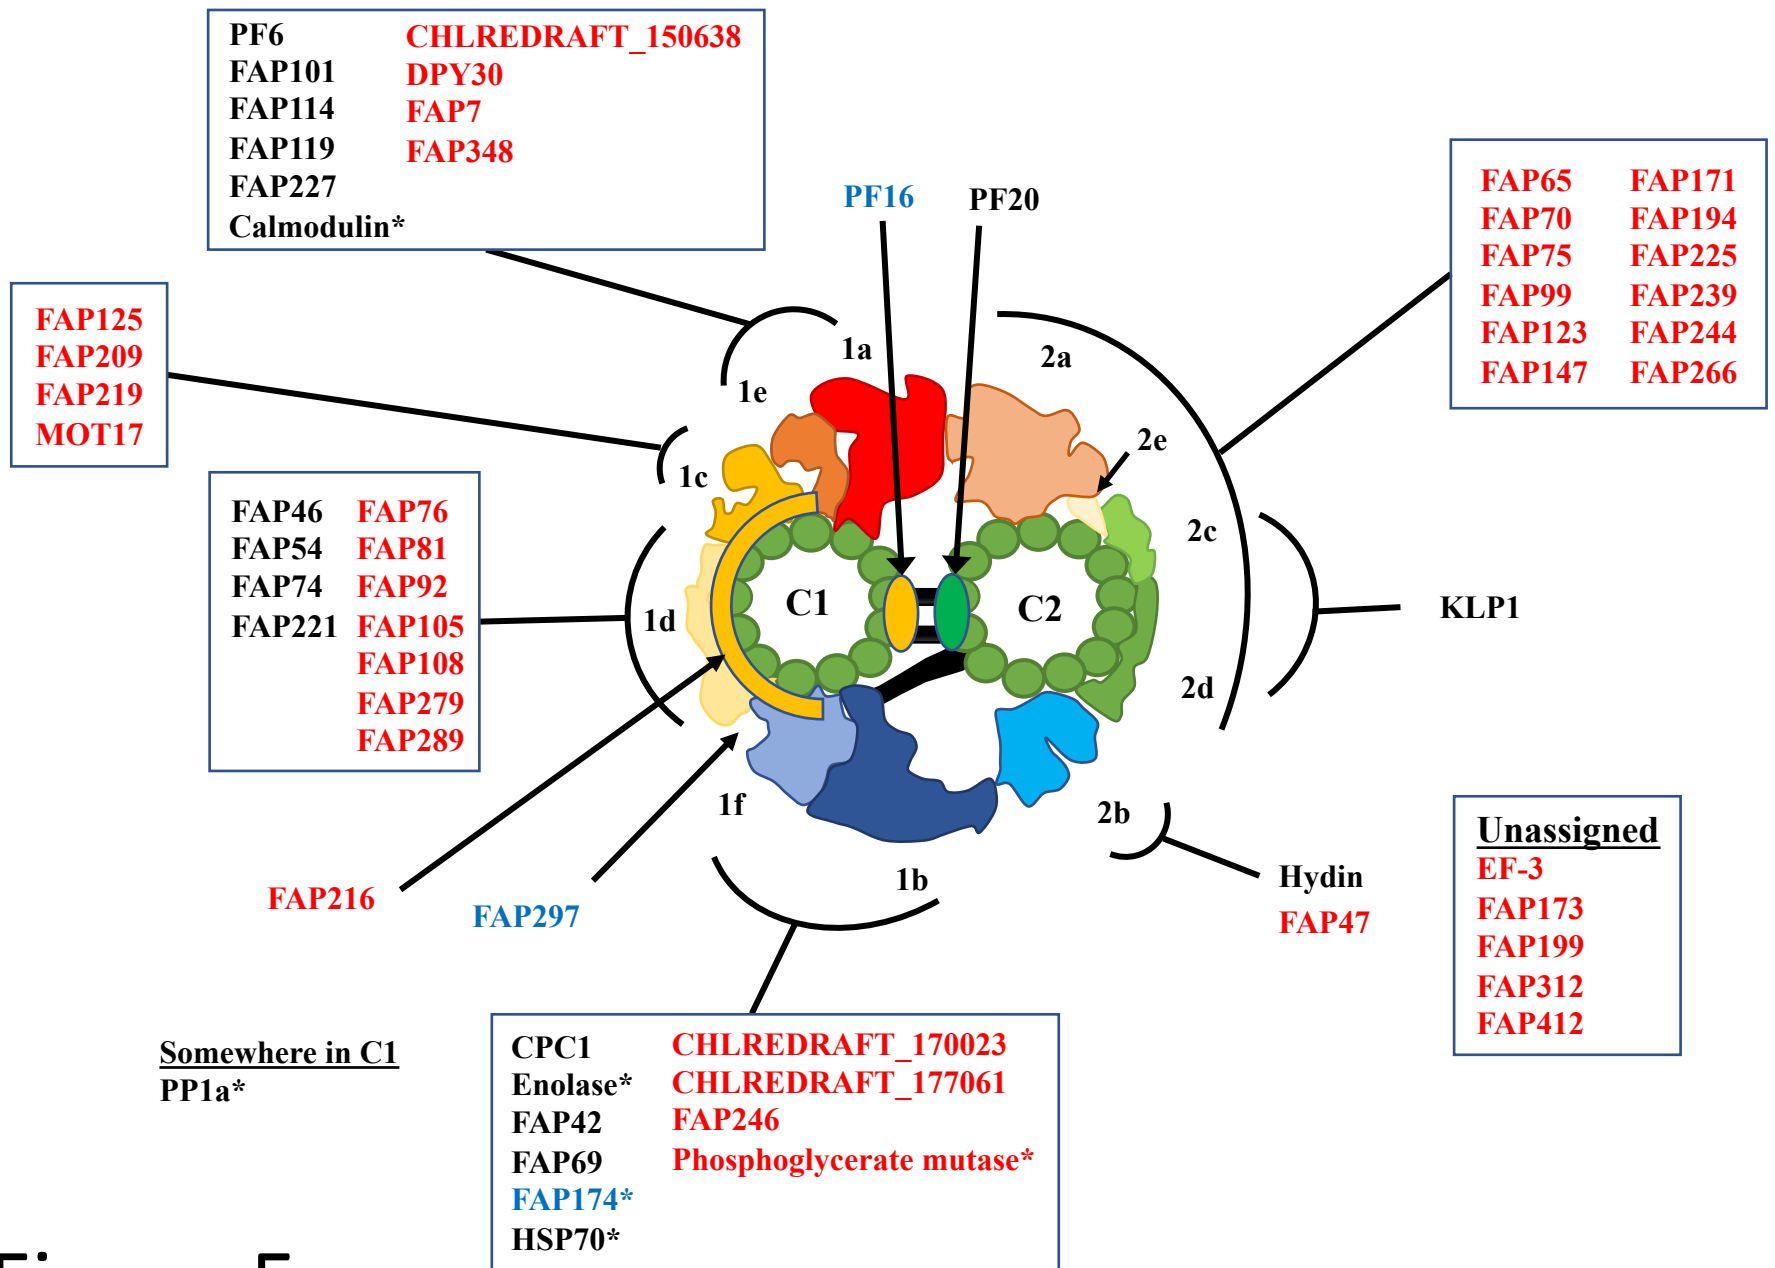

Figure 5

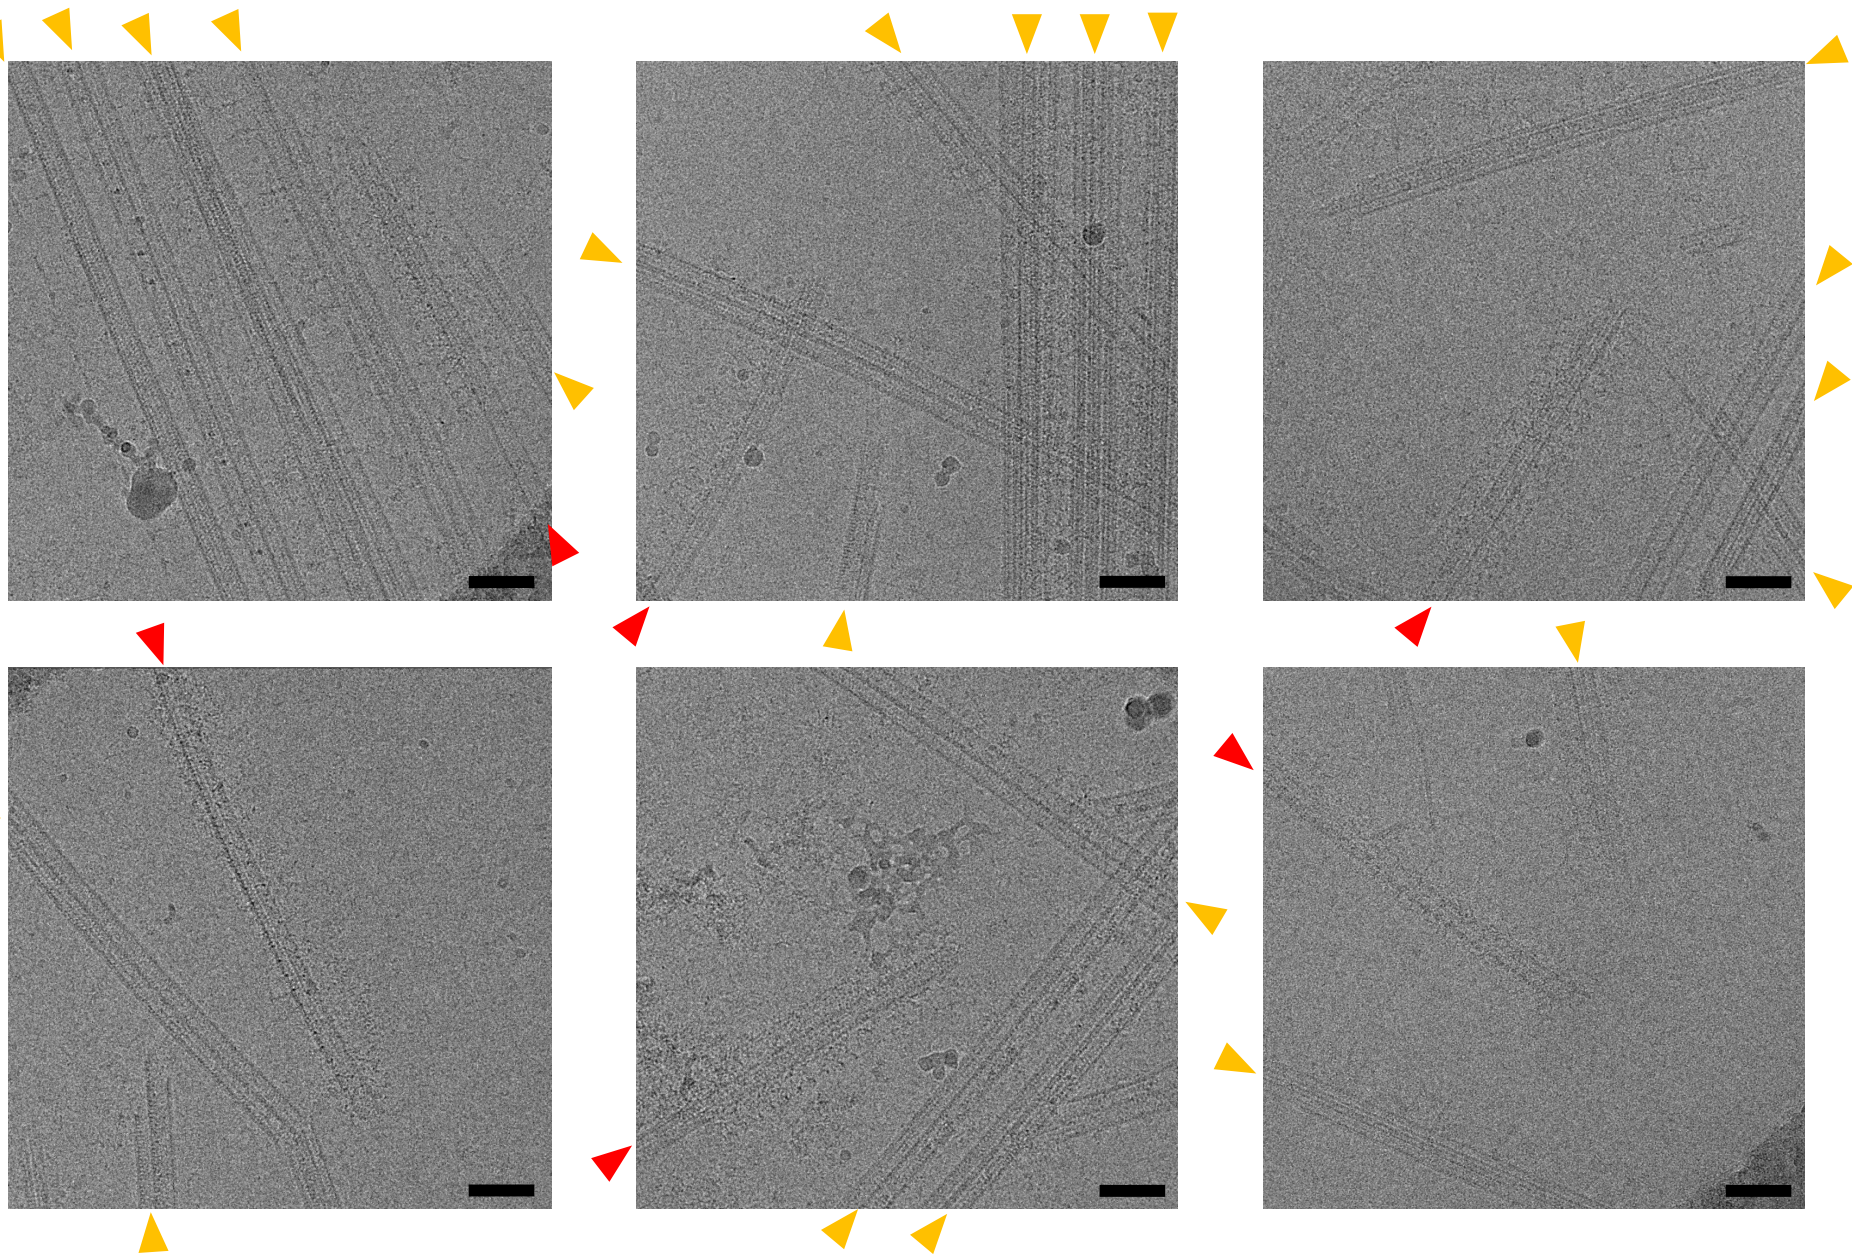

Supplementary Fig. 1



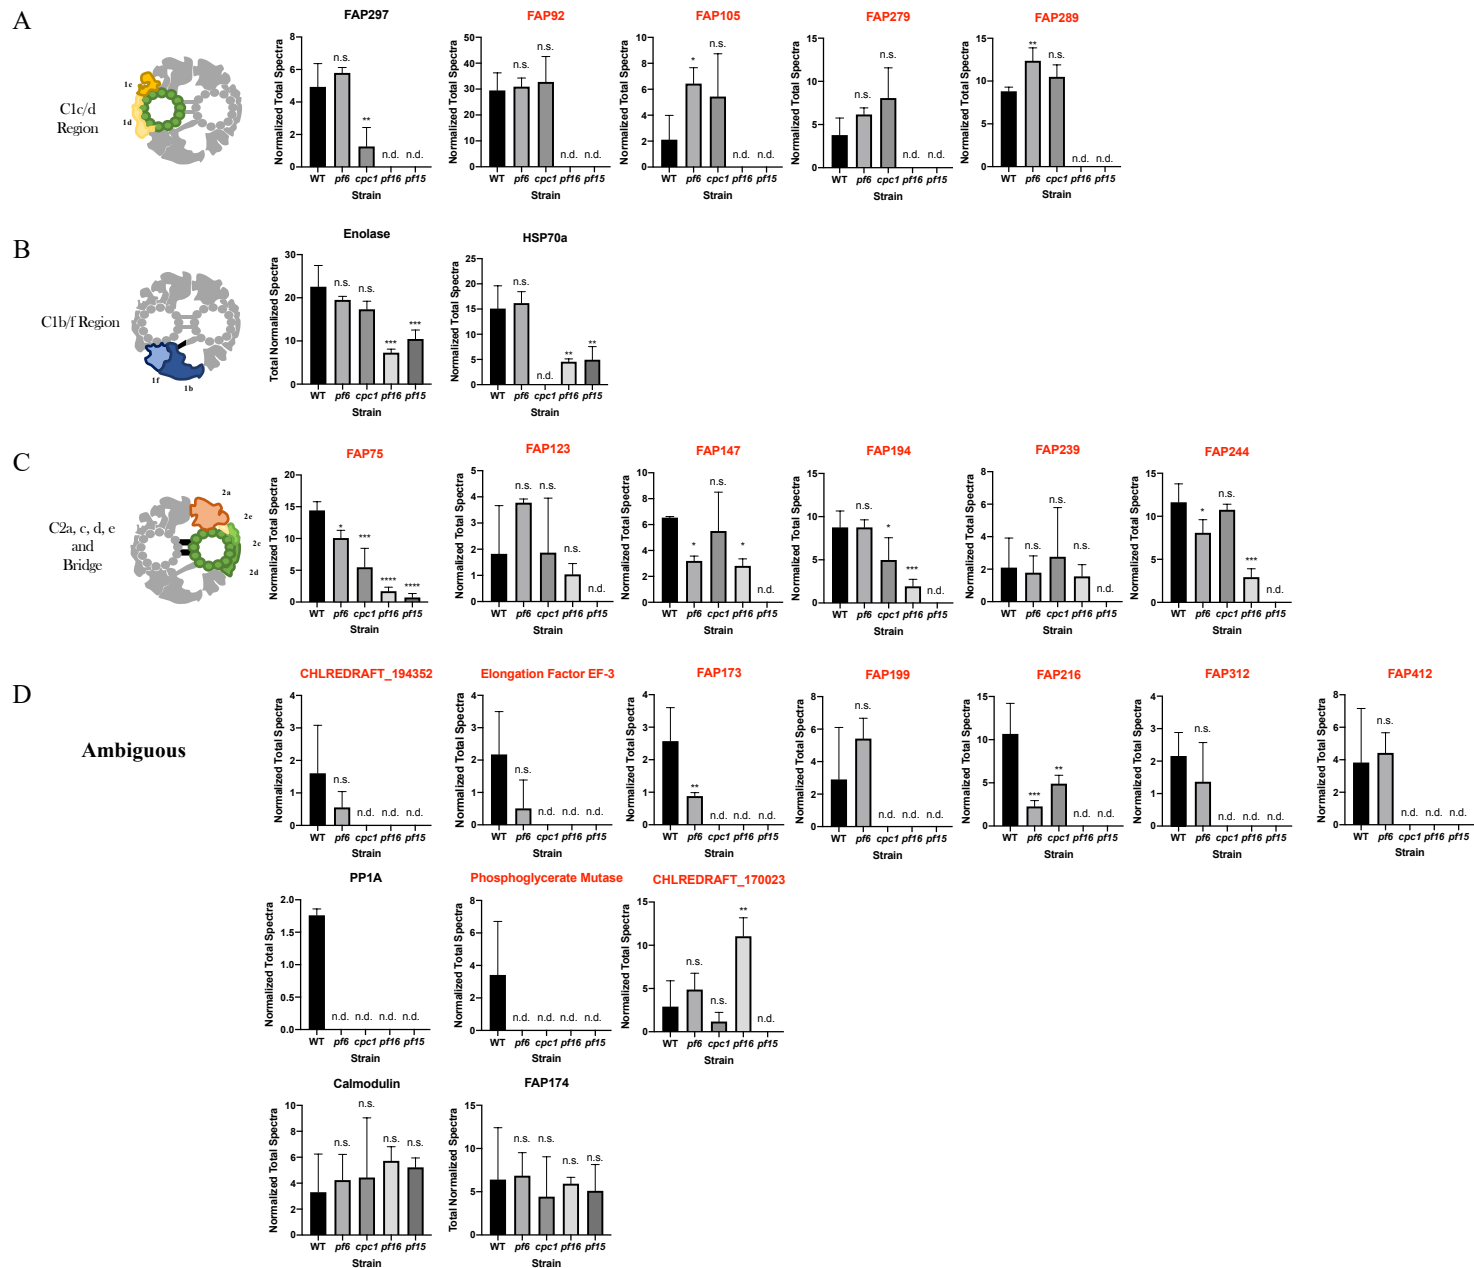

Supplementary Fig. 3
